# Supplementary material
Source: publisher site journal article supplement (https://www.spandidos-publications.com/3133/downloadSupplementary)
Supplement: Supplementary file 2 [file downloadSupplementary]

## Sheet: Sheet1
Table SXIV. Long non-coding RNA-associated competing endogenous RNA network.
GeneX	GeneY	GeneZ	S	Cor_xy
AABR07004993.1	ENSRNOT00000079713	rno-miR-122-5p	-0.41962	-0.56893
AABR07007717.3	ENSRNOT00000079713	rno-miR-122-5p	-0.131073	0.85213
AY172581.9	ENSRNOT00000079713	rno-miR-122-5p	-0.149893	-0.4573
Cmah	ENSRNOT00000079713	rno-miR-122-5p	-0.120711	-0.609341
Cndp1	ENSRNOT00000079713	rno-miR-122-5p	-0.18903	-0.863642
Cstb	ENSRNOT00000079713	rno-miR-122-5p	-0.15773	0.829147
Cyp26b1	ENSRNOT00000079713	rno-miR-122-5p	-0.355491	-0.655209
Cyp2c11	ENSRNOT00000079713	rno-miR-122-5p	-0.271357	-0.523024
Cyp2f4	ENSRNOT00000079713	rno-miR-122-5p	-0.165984	0.830725
Dkkl1	ENSRNOT00000079713	rno-miR-122-5p	-0.133018	0.864505
Fst	ENSRNOT00000079713	rno-miR-122-5p	-0.151434	-0.499855
Gjd2	ENSRNOT00000079713	rno-miR-122-5p	-0.173888	-0.697302
Gpnmb	ENSRNOT00000079713	rno-miR-122-5p	-0.146601	0.852735
Il12rb1	ENSRNOT00000079713	rno-miR-122-5p	-0.398575	-0.725908
Irf2bp1	ENSRNOT00000079713	rno-miR-122-5p	-0.278115	-0.634536
Lingo4	ENSRNOT00000079713	rno-miR-122-5p	-0.199518	0.796481
Moap1	ENSRNOT00000079713	rno-miR-122-5p	-0.148689	-0.474456
Olr1668	ENSRNOT00000079713	rno-miR-122-5p	-0.14729	-0.462889
Pde4c	ENSRNOT00000079713	rno-miR-122-5p	-0.222621	-0.642972
Ppp1r1a	ENSRNOT00000079713	rno-miR-122-5p	-0.11731	-0.769533
Prelid2	ENSRNOT00000079713	rno-miR-122-5p	-0.135723	-0.697065
Rasd2	ENSRNOT00000079713	rno-miR-122-5p	-0.124799	-0.619662
Rcan2	ENSRNOT00000079713	rno-miR-122-5p	-0.618984	-0.603001
RT1-Ba	ENSRNOT00000079713	rno-miR-122-5p	-0.109505	-0.463731
RT1-Db1	ENSRNOT00000079713	rno-miR-122-5p	-0.453111	-0.560504
Shc3	ENSRNOT00000079713	rno-miR-122-5p	-0.116102	-0.4942
Smim5	ENSRNOT00000079713	rno-miR-122-5p	-0.298666	-0.774687
Snhg11	ENSRNOT00000079713	rno-miR-122-5p	-0.252662	-0.778297
Steap1	ENSRNOT00000079713	rno-miR-122-5p	-0.105322	0.891237
Sv2b	ENSRNOT00000079713	rno-miR-122-5p	-0.135661	-0.546383
Vtn	ENSRNOT00000079713	rno-miR-122-5p	-0.193687	-0.655283
Wipf3	ENSRNOT00000079713	rno-miR-122-5p	-0.352794	-0.700803
AABR07004993.1	ENSRNOT00000079713	rno-miR-126a-5p	-0.714411	-0.56893
AY172581.9	ENSRNOT00000079713	rno-miR-126a-5p	-0.443305	-0.4573
Cmah	ENSRNOT00000079713	rno-miR-126a-5p	-1.00914	-0.609341
Cndp1	ENSRNOT00000079713	rno-miR-126a-5p	-0.577	-0.863642
Cyp26b1	ENSRNOT00000079713	rno-miR-126a-5p	-0.614532	-0.655209
Cyp2c11	ENSRNOT00000079713	rno-miR-126a-5p	-0.68394	-0.523024
Dnah9	ENSRNOT00000079713	rno-miR-126a-5p	-0.699579	-0.598091
Fst	ENSRNOT00000079713	rno-miR-126a-5p	-0.872818	-0.499855
Gjd2	ENSRNOT00000079713	rno-miR-126a-5p	-1.07184	-0.697302
Gng7	ENSRNOT00000079713	rno-miR-126a-5p	-1.28836	-0.741012
Il12rb1	ENSRNOT00000079713	rno-miR-126a-5p	-0.512767	-0.725908
Irf2bp1	ENSRNOT00000079713	rno-miR-126a-5p	-0.827662	-0.634536
Itk	ENSRNOT00000079713	rno-miR-126a-5p	-0.845703	-0.712012
Moap1	ENSRNOT00000079713	rno-miR-126a-5p	-0.39785	-0.474456
Olr1668	ENSRNOT00000079713	rno-miR-126a-5p	-0.809935	-0.462889
Pde4c	ENSRNOT00000079713	rno-miR-126a-5p	-0.755659	-0.642972
Ppp1r1a	ENSRNOT00000079713	rno-miR-126a-5p	-0.989908	-0.769533
Ppp1r1b	ENSRNOT00000079713	rno-miR-126a-5p	-0.75292	-0.488608
Prelid2	ENSRNOT00000079713	rno-miR-126a-5p	-1.15729	-0.697065
Rasd2	ENSRNOT00000079713	rno-miR-126a-5p	-0.912984	-0.619662
Rcan2	ENSRNOT00000079713	rno-miR-126a-5p	-0.437217	-0.603001
RT1-Ba	ENSRNOT00000079713	rno-miR-126a-5p	-0.909881	-0.463731
RT1-Db1	ENSRNOT00000079713	rno-miR-126a-5p	-0.669401	-0.560504
Shc3	ENSRNOT00000079713	rno-miR-126a-5p	-0.432607	-0.4942
Smim5	ENSRNOT00000079713	rno-miR-126a-5p	-0.616417	-0.774687
Snhg11	ENSRNOT00000079713	rno-miR-126a-5p	-0.661732	-0.778297
Sv2b	ENSRNOT00000079713	rno-miR-126a-5p	-0.604696	-0.546383
Tmem184b	ENSRNOT00000079713	rno-miR-126a-5p	-0.839506	-0.85087
Vtn	ENSRNOT00000079713	rno-miR-126a-5p	-0.732948	-0.655283
Wipf3	ENSRNOT00000079713	rno-miR-126a-5p	-0.742643	-0.700803
AABR07004993.1	ENSRNOT00000079713	rno-miR-200a-5p	-0.929049	-0.56893
AY172581.9	ENSRNOT00000079713	rno-miR-200a-5p	-0.462015	-0.4573
Cmah	ENSRNOT00000079713	rno-miR-200a-5p	-1.16606	-0.609341
Cndp1	ENSRNOT00000079713	rno-miR-200a-5p	-0.708347	-0.863642
Cyp26b1	ENSRNOT00000079713	rno-miR-200a-5p	-0.745794	-0.655209
Cyp2c11	ENSRNOT00000079713	rno-miR-200a-5p	-0.841751	-0.523024
Dnah9	ENSRNOT00000079713	rno-miR-200a-5p	-0.684173	-0.598091
Fst	ENSRNOT00000079713	rno-miR-200a-5p	-1.06568	-0.499855
Gjd2	ENSRNOT00000079713	rno-miR-200a-5p	-1.34779	-0.697302
Gng7	ENSRNOT00000079713	rno-miR-200a-5p	-1.48174	-0.741012
Il12rb1	ENSRNOT00000079713	rno-miR-200a-5p	-0.595452	-0.725908
Irf2bp1	ENSRNOT00000079713	rno-miR-200a-5p	-1.04678	-0.634536
Itk	ENSRNOT00000079713	rno-miR-200a-5p	-0.879535	-0.712012
Moap1	ENSRNOT00000079713	rno-miR-200a-5p	-0.386674	-0.474456
Olr1668	ENSRNOT00000079713	rno-miR-200a-5p	-0.943087	-0.462889
Pde4c	ENSRNOT00000079713	rno-miR-200a-5p	-0.850371	-0.642972
Ppp1r1a	ENSRNOT00000079713	rno-miR-200a-5p	-1.14586	-0.769533
Ppp1r1b	ENSRNOT00000079713	rno-miR-200a-5p	-0.766228	-0.488608
Prelid2	ENSRNOT00000079713	rno-miR-200a-5p	-1.49407	-0.697065
Rasd2	ENSRNOT00000079713	rno-miR-200a-5p	-1.03791	-0.619662
Rcan2	ENSRNOT00000079713	rno-miR-200a-5p	-0.580005	-0.603001
RT1-Ba	ENSRNOT00000079713	rno-miR-200a-5p	-1.08275	-0.463731
RT1-Db1	ENSRNOT00000079713	rno-miR-200a-5p	-0.880458	-0.560504
Shc3	ENSRNOT00000079713	rno-miR-200a-5p	-0.401241	-0.4942
Smim5	ENSRNOT00000079713	rno-miR-200a-5p	-0.708303	-0.774687
Snhg11	ENSRNOT00000079713	rno-miR-200a-5p	-0.744067	-0.778297
Sv2b	ENSRNOT00000079713	rno-miR-200a-5p	-0.620013	-0.546383
Tmem184b	ENSRNOT00000079713	rno-miR-200a-5p	-0.853246	-0.85087
Vtn	ENSRNOT00000079713	rno-miR-200a-5p	-0.819525	-0.655283
Wipf3	ENSRNOT00000079713	rno-miR-200a-5p	-0.951751	-0.700803
AABR07004993.1	ENSRNOT00000079713	rno-miR-322-5p	-0.996405	-0.56893
AY172581.9	ENSRNOT00000079713	rno-miR-322-5p	-0.388271	-0.4573
Cmah	ENSRNOT00000079713	rno-miR-322-5p	-1.33705	-0.609341
Cndp1	ENSRNOT00000079713	rno-miR-322-5p	-0.507793	-0.863642
Cyp26b1	ENSRNOT00000079713	rno-miR-322-5p	-0.550216	-0.655209
Cyp2c11	ENSRNOT00000079713	rno-miR-322-5p	-0.614517	-0.523024
Dnah9	ENSRNOT00000079713	rno-miR-322-5p	-0.893585	-0.598091
Fst	ENSRNOT00000079713	rno-miR-322-5p	-0.796381	-0.499855
Gjd2	ENSRNOT00000079713	rno-miR-322-5p	-1.40817	-0.697302
Gng7	ENSRNOT00000079713	rno-miR-322-5p	-1.50883	-0.741012
Il12rb1	ENSRNOT00000079713	rno-miR-322-5p	-0.547027	-0.725908
Irf2bp1	ENSRNOT00000079713	rno-miR-322-5p	-0.75875	-0.634536
Itk	ENSRNOT00000079713	rno-miR-322-5p	-0.893503	-0.712012
Moap1	ENSRNOT00000079713	rno-miR-322-5p	-0.416138	-0.474456
Olr1668	ENSRNOT00000079713	rno-miR-322-5p	-1.0897	-0.462889
Pde4c	ENSRNOT00000079713	rno-miR-322-5p	-1.01596	-0.642972
Ppp1r1a	ENSRNOT00000079713	rno-miR-322-5p	-1.41434	-0.769533
Ppp1r1b	ENSRNOT00000079713	rno-miR-322-5p	-0.948704	-0.488608
Prelid2	ENSRNOT00000079713	rno-miR-322-5p	-1.17708	-0.697065
Rasd2	ENSRNOT00000079713	rno-miR-322-5p	-0.966632	-0.619662
Rcan2	ENSRNOT00000079713	rno-miR-322-5p	-0.607061	-0.603001
RT1-Ba	ENSRNOT00000079713	rno-miR-322-5p	-1.07344	-0.463731
RT1-Db1	ENSRNOT00000079713	rno-miR-322-5p	-0.909148	-0.560504
Shc3	ENSRNOT00000079713	rno-miR-322-5p	-0.564087	-0.4942
Smim5	ENSRNOT00000079713	rno-miR-322-5p	-0.693939	-0.774687
Snhg11	ENSRNOT00000079713	rno-miR-322-5p	-0.849904	-0.778297
Sv2b	ENSRNOT00000079713	rno-miR-322-5p	-0.75603	-0.546383
Tmem184b	ENSRNOT00000079713	rno-miR-322-5p	-0.686859	-0.85087
Vtn	ENSRNOT00000079713	rno-miR-322-5p	-0.721829	-0.655283
Wipf3	ENSRNOT00000079713	rno-miR-322-5p	-0.711414	-0.700803
AABR07004993.1	ENSRNOT00000079713	rno-miR-374-5p	-0.729912	-0.56893
AY172581.9	ENSRNOT00000079713	rno-miR-374-5p	-0.675812	-0.4573
Cmah	ENSRNOT00000079713	rno-miR-374-5p	-1.1824	-0.609341
Cndp1	ENSRNOT00000079713	rno-miR-374-5p	-0.263148	-0.863642
Cyp26b1	ENSRNOT00000079713	rno-miR-374-5p	-0.604595	-0.655209
Cyp2c11	ENSRNOT00000079713	rno-miR-374-5p	-0.647161	-0.523024
Dnah9	ENSRNOT00000079713	rno-miR-374-5p	-0.768949	-0.598091
Fst	ENSRNOT00000079713	rno-miR-374-5p	-0.668565	-0.499855
Gjd2	ENSRNOT00000079713	rno-miR-374-5p	-0.79905	-0.697302
Gng7	ENSRNOT00000079713	rno-miR-374-5p	-0.890295	-0.741012
Il12rb1	ENSRNOT00000079713	rno-miR-374-5p	-0.697152	-0.725908
Irf2bp1	ENSRNOT00000079713	rno-miR-374-5p	-0.588146	-0.634536
Itk	ENSRNOT00000079713	rno-miR-374-5p	-1.14996	-0.712012
Moap1	ENSRNOT00000079713	rno-miR-374-5p	-0.728466	-0.474456
Olr1668	ENSRNOT00000079713	rno-miR-374-5p	-1.17116	-0.462889
Pde4c	ENSRNOT00000079713	rno-miR-374-5p	-0.552312	-0.642972
Ppp1r1a	ENSRNOT00000079713	rno-miR-374-5p	-0.680993	-0.769533
Ppp1r1b	ENSRNOT00000079713	rno-miR-374-5p	-1.0939	-0.488608
Prelid2	ENSRNOT00000079713	rno-miR-374-5p	-0.675428	-0.697065
Rasd2	ENSRNOT00000079713	rno-miR-374-5p	-1.30007	-0.619662
Rcan2	ENSRNOT00000079713	rno-miR-374-5p	-0.806305	-0.603001
RT1-Ba	ENSRNOT00000079713	rno-miR-374-5p	-0.578565	-0.463731
RT1-Db1	ENSRNOT00000079713	rno-miR-374-5p	-0.568442	-0.560504
Shc3	ENSRNOT00000079713	rno-miR-374-5p	-0.706122	-0.4942
Smim5	ENSRNOT00000079713	rno-miR-374-5p	-0.701679	-0.774687
Snhg11	ENSRNOT00000079713	rno-miR-374-5p	-0.643017	-0.778297
Sv2b	ENSRNOT00000079713	rno-miR-374-5p	-0.987467	-0.546383
Tmem184b	ENSRNOT00000079713	rno-miR-374-5p	-0.279519	-0.85087
Vtn	ENSRNOT00000079713	rno-miR-374-5p	-0.942788	-0.655283
Wipf3	ENSRNOT00000079713	rno-miR-374-5p	-0.621962	-0.700803
AABR07004993.1	NONRATT000004.2	rno-miR-122-5p	-0.260065	-0.604304
AY172581.9	NONRATT000004.2	rno-miR-122-5p	-0.17589	-0.497835
Cmah	NONRATT000004.2	rno-miR-122-5p	-0.112703	-0.762867
Cndp1	NONRATT000004.2	rno-miR-122-5p	-0.144871	-0.895204
Cyp26b1	NONRATT000004.2	rno-miR-122-5p	-0.287126	-0.650916
Cyp2c11	NONRATT000004.2	rno-miR-122-5p	-0.224742	-0.553833
Fst	NONRATT000004.2	rno-miR-122-5p	-0.149635	-0.59578
Gjd2	NONRATT000004.2	rno-miR-122-5p	-0.137604	-0.819122
Il12rb1	NONRATT000004.2	rno-miR-122-5p	-0.300915	-0.712547
Irf2bp1	NONRATT000004.2	rno-miR-122-5p	-0.226759	-0.681469
Itk	NONRATT000004.2	rno-miR-122-5p	-0.11239	-0.841888
Moap1	NONRATT000004.2	rno-miR-122-5p	-0.17275	-0.526104
Olr1668	NONRATT000004.2	rno-miR-122-5p	-0.113575	-0.602247
Pde4c	NONRATT000004.2	rno-miR-122-5p	-0.171633	-0.743251
Ppp1r1a	NONRATT000004.2	rno-miR-122-5p	-0.103071	-0.892798
Prelid2	NONRATT000004.2	rno-miR-122-5p	-0.131331	-0.819731
Rasd2	NONRATT000004.2	rno-miR-122-5p	-0.13557	-0.744275
Rcan2	NONRATT000004.2	rno-miR-122-5p	-0.396335	-0.534547
RT1-Ba	NONRATT000004.2	rno-miR-122-5p	-0.100824	-0.610842
RT1-Db1	NONRATT000004.2	rno-miR-122-5p	-0.281437	-0.576606
Shc3	NONRATT000004.2	rno-miR-122-5p	-0.142155	-0.588392
Smim5	NONRATT000004.2	rno-miR-122-5p	-0.220061	-0.807765
Snhg11	NONRATT000004.2	rno-miR-122-5p	-0.179152	-0.84069
Sv2b	NONRATT000004.2	rno-miR-122-5p	-0.143516	-0.656913
Vtn	NONRATT000004.2	rno-miR-122-5p	-0.187668	-0.729791
Wipf3	NONRATT000004.2	rno-miR-122-5p	-0.264961	-0.717771
AABR07004993.1	NONRATT000004.2	rno-miR-126a-5p	-1.32359	-0.604304
AY172581.9	NONRATT000004.2	rno-miR-126a-5p	-0.585075	-0.497835
Cmah	NONRATT000004.2	rno-miR-126a-5p	-1.26989	-0.762867
Cndp1	NONRATT000004.2	rno-miR-126a-5p	-1.42524	-0.895204
Cyp26b1	NONRATT000004.2	rno-miR-126a-5p	-1.23176	-0.650916
Cyp2c11	NONRATT000004.2	rno-miR-126a-5p	-1.28873	-0.553833
Dnah9	NONRATT000004.2	rno-miR-126a-5p	-0.509314	-0.752439
Fst	NONRATT000004.2	rno-miR-126a-5p	-1.46255	-0.59578
Gjd2	NONRATT000004.2	rno-miR-126a-5p	-1.58209	-0.819122
Gng7	NONRATT000004.2	rno-miR-126a-5p	-1.49992	-0.899751
Il12rb1	NONRATT000004.2	rno-miR-126a-5p	-0.962921	-0.712547
Irf2bp1	NONRATT000004.2	rno-miR-126a-5p	-1.56597	-0.681469
Itk	NONRATT000004.2	rno-miR-126a-5p	-0.899128	-0.841888
Moap1	NONRATT000004.2	rno-miR-126a-5p	-0.381967	-0.526104
Olr1668	NONRATT000004.2	rno-miR-126a-5p	-1.07563	-0.602247
Pde4c	NONRATT000004.2	rno-miR-126a-5p	-0.964359	-0.743251
Ppp1r1a	NONRATT000004.2	rno-miR-126a-5p	-1.26137	-0.892798
Ppp1r1b	NONRATT000004.2	rno-miR-126a-5p	-0.653508	-0.668991
Prelid2	NONRATT000004.2	rno-miR-126a-5p	-1.79453	-0.819731
Rasd2	NONRATT000004.2	rno-miR-126a-5p	-1.23765	-0.744275
Rcan2	NONRATT000004.2	rno-miR-126a-5p	-1.01835	-0.534547
RT1-Ba	NONRATT000004.2	rno-miR-126a-5p	-1.28794	-0.610842
RT1-Db1	NONRATT000004.2	rno-miR-126a-5p	-1.3069	-0.576606
Shc3	NONRATT000004.2	rno-miR-126a-5p	-0.25279	-0.588392
Smim5	NONRATT000004.2	rno-miR-126a-5p	-1.0384	-0.807765
Snhg11	NONRATT000004.2	rno-miR-126a-5p	-0.94595	-0.84069
Sv2b	NONRATT000004.2	rno-miR-126a-5p	-0.585272	-0.656913
Tmem184b	NONRATT000004.2	rno-miR-126a-5p	-0.686095	-0.975498
Vtn	NONRATT000004.2	rno-miR-126a-5p	-1.07224	-0.729791
Wipf3	NONRATT000004.2	rno-miR-126a-5p	-1.53285	-0.717771
AABR07004993.1	NONRATT000004.2	rno-miR-200a-5p	-1.30224	-0.604304
AY172581.9	NONRATT000004.2	rno-miR-200a-5p	-0.505714	-0.497835
Cmah	NONRATT000004.2	rno-miR-200a-5p	-1.09275	-0.762867
Cndp1	NONRATT000004.2	rno-miR-200a-5p	-1.18614	-0.895204
Cyp26b1	NONRATT000004.2	rno-miR-200a-5p	-1.13213	-0.650916
Cyp2c11	NONRATT000004.2	rno-miR-200a-5p	-1.17577	-0.553833
Dnah9	NONRATT000004.2	rno-miR-200a-5p	-0.42589	-0.752439
Fst	NONRATT000004.2	rno-miR-200a-5p	-1.30556	-0.59578
Gjd2	NONRATT000004.2	rno-miR-200a-5p	-1.40615	-0.819122
Gng7	NONRATT000004.2	rno-miR-200a-5p	-1.07673	-0.899751
Il12rb1	NONRATT000004.2	rno-miR-200a-5p	-0.8968	-0.712547
Irf2bp1	NONRATT000004.2	rno-miR-200a-5p	-1.44829	-0.681469
Itk	NONRATT000004.2	rno-miR-200a-5p	-0.700975	-0.841888
Moap1	NONRATT000004.2	rno-miR-200a-5p	-0.338484	-0.526104
Olr1668	NONRATT000004.2	rno-miR-200a-5p	-0.970015	-0.602247
Pde4c	NONRATT000004.2	rno-miR-200a-5p	-0.862699	-0.743251
Ppp1r1a	NONRATT000004.2	rno-miR-200a-5p	-0.980708	-0.892798
Ppp1r1b	NONRATT000004.2	rno-miR-200a-5p	-0.542518	-0.668991
Prelid2	NONRATT000004.2	rno-miR-200a-5p	-1.59212	-0.819731
Rasd2	NONRATT000004.2	rno-miR-200a-5p	-1.05001	-0.744275
Rcan2	NONRATT000004.2	rno-miR-200a-5p	-1.03717	-0.534547
RT1-Ba	NONRATT000004.2	rno-miR-200a-5p	-1.14915	-0.610842
RT1-Db1	NONRATT000004.2	rno-miR-200a-5p	-1.29508	-0.576606
Shc3	NONRATT000004.2	rno-miR-200a-5p	-0.235368	-0.588392
Smim5	NONRATT000004.2	rno-miR-200a-5p	-0.926207	-0.807765
Snhg11	NONRATT000004.2	rno-miR-200a-5p	-0.82647	-0.84069
Sv2b	NONRATT000004.2	rno-miR-200a-5p	-0.515091	-0.656913
Tmem184b	NONRATT000004.2	rno-miR-200a-5p	-0.278448	-0.975498
Vtn	NONRATT000004.2	rno-miR-200a-5p	-0.922213	-0.729791
Wipf3	NONRATT000004.2	rno-miR-200a-5p	-1.44826	-0.717771
AABR07004993.1	NONRATT000004.2	rno-miR-322-5p	-1.58203	-0.604304
AY172581.9	NONRATT000004.2	rno-miR-322-5p	-0.411851	-0.497835
Cmah	NONRATT000004.2	rno-miR-322-5p	-1.50279	-0.762867
Cndp1	NONRATT000004.2	rno-miR-322-5p	-0.835015	-0.895204
Cyp26b1	NONRATT000004.2	rno-miR-322-5p	-0.827256	-0.650916
Cyp2c11	NONRATT000004.2	rno-miR-322-5p	-0.85276	-0.553833
Dnah9	NONRATT000004.2	rno-miR-322-5p	-0.837663	-0.752439
Fst	NONRATT000004.2	rno-miR-322-5p	-0.977308	-0.59578
Gjd2	NONRATT000004.2	rno-miR-322-5p	-1.7233	-0.819122
Gng7	NONRATT000004.2	rno-miR-322-5p	-1.29204	-0.899751
Il12rb1	NONRATT000004.2	rno-miR-322-5p	-0.87967	-0.712547
Irf2bp1	NONRATT000004.2	rno-miR-322-5p	-1.05364	-0.681469
Itk	NONRATT000004.2	rno-miR-322-5p	-0.846588	-0.841888
Moap1	NONRATT000004.2	rno-miR-322-5p	-0.426118	-0.526104
Olr1668	NONRATT000004.2	rno-miR-322-5p	-1.3378	-0.602247
Pde4c	NONRATT000004.2	rno-miR-322-5p	-1.27533	-0.743251
Ppp1r1a	NONRATT000004.2	rno-miR-322-5p	-1.54161	-0.892798
Ppp1r1b	NONRATT000004.2	rno-miR-322-5p	-0.919771	-0.668991
Prelid2	NONRATT000004.2	rno-miR-322-5p	-1.35745	-0.819731
Rasd2	NONRATT000004.2	rno-miR-322-5p	-1.07828	-0.744275
Rcan2	NONRATT000004.2	rno-miR-322-5p	-1.17795	-0.534547
RT1-Ba	NONRATT000004.2	rno-miR-322-5p	-1.27769	-0.610842
RT1-Db1	NONRATT000004.2	rno-miR-322-5p	-1.49131	-0.576606
Shc3	NONRATT000004.2	rno-miR-322-5p	-0.565525	-0.588392
Smim5	NONRATT000004.2	rno-miR-322-5p	-1.04389	-0.807765
Snhg11	NONRATT000004.2	rno-miR-322-5p	-1.21021	-0.84069
Sv2b	NONRATT000004.2	rno-miR-322-5p	-0.825709	-0.656913
Tmem184b	NONRATT000004.2	rno-miR-322-5p	-0.278942	-0.975498
Vtn	NONRATT000004.2	rno-miR-322-5p	-0.858803	-0.729791
Wipf3	NONRATT000004.2	rno-miR-322-5p	-1.10296	-0.717771
AABR07004993.1	NONRATT000004.2	rno-miR-374-5p	-0.972851	-0.604304
AY172581.9	NONRATT000004.2	rno-miR-374-5p	-0.873442	-0.497835
Cmah	NONRATT000004.2	rno-miR-374-5p	-1.14677	-0.762867
Cndp1	NONRATT000004.2	rno-miR-374-5p	-0.465608	-0.895204
Cyp26b1	NONRATT000004.2	rno-miR-374-5p	-0.893243	-0.650916
Cyp2c11	NONRATT000004.2	rno-miR-374-5p	-0.848049	-0.553833
Dnah9	NONRATT000004.2	rno-miR-374-5p	-0.700467	-0.752439
Fst	NONRATT000004.2	rno-miR-374-5p	-0.744798	-0.59578
Gjd2	NONRATT000004.2	rno-miR-374-5p	-0.78541	-0.819122
Gng7	NONRATT000004.2	rno-miR-374-5p	-0.506681	-0.899751
Il12rb1	NONRATT000004.2	rno-miR-374-5p	-1.23574	-0.712547
Irf2bp1	NONRATT000004.2	rno-miR-374-5p	-0.727294	-0.681469
Itk	NONRATT000004.2	rno-miR-374-5p	-1.06677	-0.841888
Moap1	NONRATT000004.2	rno-miR-374-5p	-0.928977	-0.526104
Olr1668	NONRATT000004.2	rno-miR-374-5p	-1.30573	-0.602247
Pde4c	NONRATT000004.2	rno-miR-374-5p	-0.54555	-0.743251
Ppp1r1a	NONRATT000004.2	rno-miR-374-5p	-0.548572	-0.892798
Ppp1r1b	NONRATT000004.2	rno-miR-374-5p	-1.06531	-0.668991
Prelid2	NONRATT000004.2	rno-miR-374-5p	-0.632355	-0.819731
Rasd2	NONRATT000004.2	rno-miR-374-5p	-1.42543	-0.744275
Rcan2	NONRATT000004.2	rno-miR-374-5p	-1.42555	-0.534547
RT1-Ba	NONRATT000004.2	rno-miR-374-5p	-0.532264	-0.610842
RT1-Db1	NONRATT000004.2	rno-miR-374-5p	-0.755359	-0.576606
Shc3	NONRATT000004.2	rno-miR-374-5p	-0.802387	-0.588392
Smim5	NONRATT000004.2	rno-miR-374-5p	-1.38198	-0.807765
Snhg11	NONRATT000004.2	rno-miR-374-5p	-0.950767	-0.84069
Sv2b	NONRATT000004.2	rno-miR-374-5p	-1.13251	-0.656913
Vtn	NONRATT000004.2	rno-miR-374-5p	-1.20274	-0.729791
Wipf3	NONRATT000004.2	rno-miR-374-5p	-0.90253	-0.717771
AABR07007717.3	NONRATT000173.2	rno-miR-122-5p	-0.164318	-0.794411
Apln	NONRATT000173.2	rno-miR-122-5p	-0.202406	-0.772209
Arntl	NONRATT000173.2	rno-miR-122-5p	-0.148423	-0.807712
Cldn22	NONRATT000173.2	rno-miR-122-5p	-0.217779	-0.760298
Cstb	NONRATT000173.2	rno-miR-122-5p	-0.179553	-0.763888
Cyp2f4	NONRATT000173.2	rno-miR-122-5p	-0.228974	-0.700389
Dkkl1	NONRATT000173.2	rno-miR-122-5p	-0.237332	-0.716466
Ephx1	NONRATT000173.2	rno-miR-122-5p	-0.110747	-0.853566
Gpnmb	NONRATT000173.2	rno-miR-122-5p	-0.197394	-0.754739
Gpt2	NONRATT000173.2	rno-miR-122-5p	-0.232938	-0.74362
Gstm1	NONRATT000173.2	rno-miR-122-5p	-0.158799	-0.809318
Lingo4	NONRATT000173.2	rno-miR-122-5p	-0.213826	-0.688981
Mfsd2a	NONRATT000173.2	rno-miR-122-5p	-0.249172	-0.731286
Plin1	NONRATT000173.2	rno-miR-122-5p	-0.861072	-0.556662
RT1-A3	NONRATT000173.2	rno-miR-122-5p	-0.390835	-0.633855
Steap1	NONRATT000173.2	rno-miR-122-5p	-0.213611	-0.755492
Ucp1	NONRATT000173.2	rno-miR-122-5p	-0.959565	-0.491449
AABR07007717.3	NONRATT000173.2	rno-miR-126a-5p	-1.03666	-0.794411
Ak1	NONRATT000173.2	rno-miR-126a-5p	-0.125414	-0.914698
Apln	NONRATT000173.2	rno-miR-126a-5p	-1.14543	-0.772209
Apoa4	NONRATT000173.2	rno-miR-126a-5p	-0.716289	-0.832486
Arntl	NONRATT000173.2	rno-miR-126a-5p	-1.223	-0.807712
Car13	NONRATT000173.2	rno-miR-126a-5p	-0.777442	-0.786734
Cldn22	NONRATT000173.2	rno-miR-126a-5p	-1.17904	-0.760298
Cplx1	NONRATT000173.2	rno-miR-126a-5p	-0.212055	-0.931027
Cstb	NONRATT000173.2	rno-miR-126a-5p	-1.13719	-0.763888
Cyp2f4	NONRATT000173.2	rno-miR-126a-5p	-1.15209	-0.700389
Dkkl1	NONRATT000173.2	rno-miR-126a-5p	-1.20105	-0.716466
Ephx1	NONRATT000173.2	rno-miR-126a-5p	-0.643851	-0.853566
Gas2l3	NONRATT000173.2	rno-miR-126a-5p	-0.444081	-0.874778
Gpnmb	NONRATT000173.2	rno-miR-126a-5p	-1.11839	-0.754739
Gpt2	NONRATT000173.2	rno-miR-126a-5p	-0.9088	-0.74362
Gstm1	NONRATT000173.2	rno-miR-126a-5p	-1.18364	-0.809318
Hcar2	NONRATT000173.2	rno-miR-126a-5p	-0.462095	-0.874854
Lingo4	NONRATT000173.2	rno-miR-126a-5p	-1.17548	-0.688981
LOC100360679	NONRATT000173.2	rno-miR-126a-5p	-0.188373	-0.922728
Lox	NONRATT000173.2	rno-miR-126a-5p	-0.628685	-0.842519
Mat1a	NONRATT000173.2	rno-miR-126a-5p	-0.239764	-0.922576
Mfsd2a	NONRATT000173.2	rno-miR-126a-5p	-0.992098	-0.731286
Plin1	NONRATT000173.2	rno-miR-126a-5p	-0.442746	-0.556662
RT1-A3	NONRATT000173.2	rno-miR-126a-5p	-0.188114	-0.633855
Slc16a1	NONRATT000173.2	rno-miR-126a-5p	-0.363094	-0.833293
Slc5a8	NONRATT000173.2	rno-miR-126a-5p	-0.701456	-0.717421
Steap1	NONRATT000173.2	rno-miR-126a-5p	-1.20799	-0.755492
Ucp1	NONRATT000173.2	rno-miR-126a-5p	-0.410107	-0.491449
AABR07007717.3	NONRATT000173.2	rno-miR-200a-5p	-0.870896	-0.794411
Ak1	NONRATT000173.2	rno-miR-200a-5p	-0.182461	-0.914698
Apln	NONRATT000173.2	rno-miR-200a-5p	-1.03037	-0.772209
Apoa4	NONRATT000173.2	rno-miR-200a-5p	-0.796918	-0.832486
Arntl	NONRATT000173.2	rno-miR-200a-5p	-1.14299	-0.807712
Car13	NONRATT000173.2	rno-miR-200a-5p	-0.850516	-0.786734
Cldn22	NONRATT000173.2	rno-miR-200a-5p	-1.10117	-0.760298
Cplx1	NONRATT000173.2	rno-miR-200a-5p	-0.228558	-0.931027
Cstb	NONRATT000173.2	rno-miR-200a-5p	-0.921793	-0.763888
Cyp2f4	NONRATT000173.2	rno-miR-200a-5p	-0.941829	-0.700389
Dkkl1	NONRATT000173.2	rno-miR-200a-5p	-0.996376	-0.716466
Ephx1	NONRATT000173.2	rno-miR-200a-5p	-0.673913	-0.853566
Gas2l3	NONRATT000173.2	rno-miR-200a-5p	-0.474021	-0.874778
Gpnmb	NONRATT000173.2	rno-miR-200a-5p	-0.917838	-0.754739
Gpt2	NONRATT000173.2	rno-miR-200a-5p	-0.893967	-0.74362
Gstm1	NONRATT000173.2	rno-miR-200a-5p	-0.988692	-0.809318
Hcar2	NONRATT000173.2	rno-miR-200a-5p	-0.568711	-0.874854
Lingo4	NONRATT000173.2	rno-miR-200a-5p	-0.949713	-0.688981
LOC100360679	NONRATT000173.2	rno-miR-200a-5p	-0.110051	-0.922728
Lox	NONRATT000173.2	rno-miR-200a-5p	-0.698806	-0.842519
Mat1a	NONRATT000173.2	rno-miR-200a-5p	-0.249795	-0.922576
Mfsd2a	NONRATT000173.2	rno-miR-200a-5p	-1.00767	-0.731286
Plin1	NONRATT000173.2	rno-miR-200a-5p	-0.575192	-0.556662
RT1-A3	NONRATT000173.2	rno-miR-200a-5p	-0.330913	-0.633855
Slc16a1	NONRATT000173.2	rno-miR-200a-5p	-0.490215	-0.833293
Slc5a8	NONRATT000173.2	rno-miR-200a-5p	-0.779836	-0.717421
Steap1	NONRATT000173.2	rno-miR-200a-5p	-1.01588	-0.755492
Ucp1	NONRATT000173.2	rno-miR-200a-5p	-0.544806	-0.491449
AABR07007717.3	NONRATT000173.2	rno-miR-322-5p	-1.00829	-0.794411
Ak1	NONRATT000173.2	rno-miR-322-5p	-0.175325	-0.914698
Apln	NONRATT000173.2	rno-miR-322-5p	-1.12848	-0.772209
Apoa4	NONRATT000173.2	rno-miR-322-5p	-1.03147	-0.832486
Arntl	NONRATT000173.2	rno-miR-322-5p	-1.17492	-0.807712
Car13	NONRATT000173.2	rno-miR-322-5p	-1.01403	-0.786734
Cldn22	NONRATT000173.2	rno-miR-322-5p	-1.21682	-0.760298
Cplx1	NONRATT000173.2	rno-miR-322-5p	-0.357586	-0.931027
Cstb	NONRATT000173.2	rno-miR-322-5p	-1.16549	-0.763888
Cyp2f4	NONRATT000173.2	rno-miR-322-5p	-1.05954	-0.700389
Dkkl1	NONRATT000173.2	rno-miR-322-5p	-1.11747	-0.716466
Ephx1	NONRATT000173.2	rno-miR-322-5p	-0.775972	-0.853566
Gas2l3	NONRATT000173.2	rno-miR-322-5p	-0.796234	-0.874778
Gpnmb	NONRATT000173.2	rno-miR-322-5p	-1.08241	-0.754739
Gpt2	NONRATT000173.2	rno-miR-322-5p	-0.979563	-0.74362
Gstm1	NONRATT000173.2	rno-miR-322-5p	-1.22372	-0.809318
Hcar2	NONRATT000173.2	rno-miR-322-5p	-0.843204	-0.874854
Lingo4	NONRATT000173.2	rno-miR-322-5p	-1.05815	-0.688981
LOC100360679	NONRATT000173.2	rno-miR-322-5p	-0.423781	-0.922728
Lox	NONRATT000173.2	rno-miR-322-5p	-1.00535	-0.842519
Mat1a	NONRATT000173.2	rno-miR-322-5p	-0.424976	-0.922576
Mfsd2a	NONRATT000173.2	rno-miR-322-5p	-1.08897	-0.731286
Plin1	NONRATT000173.2	rno-miR-322-5p	-0.598637	-0.556662
RT1-A3	NONRATT000173.2	rno-miR-322-5p	-0.347685	-0.633855
Slc16a1	NONRATT000173.2	rno-miR-322-5p	-0.583985	-0.833293
Slc5a8	NONRATT000173.2	rno-miR-322-5p	-0.840891	-0.717421
Steap1	NONRATT000173.2	rno-miR-322-5p	-1.19234	-0.755492
Ucp1	NONRATT000173.2	rno-miR-322-5p	-0.559271	-0.491449
AABR07007717.3	NONRATT000173.2	rno-miR-374-5p	-1.54049	-0.794411
Ak1	NONRATT000173.2	rno-miR-374-5p	-0.722051	-0.914698
Apln	NONRATT000173.2	rno-miR-374-5p	-1.56798	-0.772209
Apoa4	NONRATT000173.2	rno-miR-374-5p	-1.5083	-0.832486
Arntl	NONRATT000173.2	rno-miR-374-5p	-1.76219	-0.807712
Car13	NONRATT000173.2	rno-miR-374-5p	-1.38474	-0.786734
Cldn22	NONRATT000173.2	rno-miR-374-5p	-1.54965	-0.760298
Cplx1	NONRATT000173.2	rno-miR-374-5p	-1.3184	-0.931027
Cstb	NONRATT000173.2	rno-miR-374-5p	-1.42586	-0.763888
Cyp2f4	NONRATT000173.2	rno-miR-374-5p	-1.37703	-0.700389
Dkkl1	NONRATT000173.2	rno-miR-374-5p	-1.4333	-0.716466
Ephx1	NONRATT000173.2	rno-miR-374-5p	-1.73178	-0.853566
Gas2l3	NONRATT000173.2	rno-miR-374-5p	-1.18121	-0.874778
Gpnmb	NONRATT000173.2	rno-miR-374-5p	-1.43851	-0.754739
Gpt2	NONRATT000173.2	rno-miR-374-5p	-1.38654	-0.74362
Gstm1	NONRATT000173.2	rno-miR-374-5p	-1.61034	-0.809318
Hcar2	NONRATT000173.2	rno-miR-374-5p	-1.6878	-0.874854
Lingo4	NONRATT000173.2	rno-miR-374-5p	-1.37778	-0.688981
LOC100360679	NONRATT000173.2	rno-miR-374-5p	-1.72422	-0.922728
Lox	NONRATT000173.2	rno-miR-374-5p	-1.3972	-0.842519
Lrrcc1	NONRATT000173.2	rno-miR-374-5p	-0.340269	-0.971004
Mat1a	NONRATT000173.2	rno-miR-374-5p	-1.52213	-0.922576
Mfsd2a	NONRATT000173.2	rno-miR-374-5p	-1.43333	-0.731286
Plin1	NONRATT000173.2	rno-miR-374-5p	-0.79616	-0.556662
RT1-A3	NONRATT000173.2	rno-miR-374-5p	-0.549686	-0.633855
Slc16a1	NONRATT000173.2	rno-miR-374-5p	-1.04228	-0.833293
Slc5a8	NONRATT000173.2	rno-miR-374-5p	-1.20696	-0.717421
Steap1	NONRATT000173.2	rno-miR-374-5p	-1.48867	-0.755492
Ucp1	NONRATT000173.2	rno-miR-374-5p	-0.72168	-0.491449
AABR07007717.3	NONRATT001846.2	rno-miR-122-5p	-0.1476	-0.535325
Apln	NONRATT001846.2	rno-miR-122-5p	-0.150801	-0.526732
Apoa4	NONRATT001846.2	rno-miR-122-5p	-0.177773	-0.48331
Car13	NONRATT001846.2	rno-miR-122-5p	-0.241731	-0.439335
Cldn22	NONRATT001846.2	rno-miR-122-5p	-0.179747	-0.49216
Cstb	NONRATT001846.2	rno-miR-122-5p	-0.210449	-0.405116
Cyp2f4	NONRATT001846.2	rno-miR-122-5p	-0.197826	-0.430295
Dkkl1	NONRATT001846.2	rno-miR-122-5p	-0.201704	-0.446205
Gas2l3	NONRATT001846.2	rno-miR-122-5p	-0.186601	-0.382431
Gpnmb	NONRATT001846.2	rno-miR-122-5p	-0.197752	-0.445698
Gpt2	NONRATT001846.2	rno-miR-122-5p	-0.207352	-0.463936
Gstm1	NONRATT001846.2	rno-miR-122-5p	-0.169595	-0.505141
Hcar2	NONRATT001846.2	rno-miR-122-5p	-0.117633	-0.56866
Lingo4	NONRATT001846.2	rno-miR-122-5p	-0.178148	-0.445412
Lox	NONRATT001846.2	rno-miR-122-5p	-0.278188	-0.413861
Lrrcc1	NONRATT001846.2	rno-miR-122-5p	-0.10838	-0.509916
Mfsd2a	NONRATT001846.2	rno-miR-122-5p	-0.19693	-0.46765
Plin1	NONRATT001846.2	rno-miR-122-5p	-0.596263	-0.328396
RT1-A3	NONRATT001846.2	rno-miR-122-5p	-0.293027	-0.379205
Slc16a1	NONRATT001846.2	rno-miR-122-5p	-0.123196	-0.527951
Slc5a8	NONRATT001846.2	rno-miR-122-5p	-0.185988	-0.439087
Steap1	NONRATT001846.2	rno-miR-122-5p	-0.21152	-0.445549
Ucp1	NONRATT001846.2	rno-miR-122-5p	-0.610894	-0.291202
AABR07007717.3	NONRATT001846.2	rno-miR-126a-5p	-0.64044	-0.535325
Ak1	NONRATT001846.2	rno-miR-126a-5p	-0.174152	-0.733614
Apln	NONRATT001846.2	rno-miR-126a-5p	-0.658113	-0.526732
Apoa4	NONRATT001846.2	rno-miR-126a-5p	-0.762286	-0.48331
Car13	NONRATT001846.2	rno-miR-126a-5p	-0.72231	-0.439335
Cldn22	NONRATT001846.2	rno-miR-126a-5p	-0.764858	-0.49216
Cplx1	NONRATT001846.2	rno-miR-126a-5p	-0.378339	-0.596914
Cstb	NONRATT001846.2	rno-miR-126a-5p	-1.0517	-0.405116
Cyp2f4	NONRATT001846.2	rno-miR-126a-5p	-0.761606	-0.430295
Dkkl1	NONRATT001846.2	rno-miR-126a-5p	-0.789094	-0.446205
Gas2l3	NONRATT001846.2	rno-miR-126a-5p	-0.887381	-0.382431
Gpnmb	NONRATT001846.2	rno-miR-126a-5p	-0.859407	-0.445698
Gpt2	NONRATT001846.2	rno-miR-126a-5p	-0.647945	-0.463936
Gstm1	NONRATT001846.2	rno-miR-126a-5p	-0.978461	-0.505141
Hcar2	NONRATT001846.2	rno-miR-126a-5p	-0.549241	-0.56866
Lingo4	NONRATT001846.2	rno-miR-126a-5p	-0.716157	-0.445412
LOC100360679	NONRATT001846.2	rno-miR-126a-5p	-0.358162	-0.607097
Lox	NONRATT001846.2	rno-miR-126a-5p	-0.911934	-0.413861
Lrrcc1	NONRATT001846.2	rno-miR-126a-5p	-0.4265	-0.509916
Mat1a	NONRATT001846.2	rno-miR-126a-5p	-0.340103	-0.616518
Mfsd2a	NONRATT001846.2	rno-miR-126a-5p	-0.659699	-0.46765
Plin1	NONRATT001846.2	rno-miR-126a-5p	-0.35042	-0.328396
RT1-A3	NONRATT001846.2	rno-miR-126a-5p	-0.254656	-0.379205
Slc16a1	NONRATT001846.2	rno-miR-126a-5p	-0.394634	-0.527951
Slc5a8	NONRATT001846.2	rno-miR-126a-5p	-0.531498	-0.439087
Steap1	NONRATT001846.2	rno-miR-126a-5p	-0.929213	-0.445549
Ucp1	NONRATT001846.2	rno-miR-126a-5p	-0.313897	-0.291202
AABR07007717.3	NONRATT001846.2	rno-miR-200a-5p	-0.668771	-0.535325
Ak1	NONRATT001846.2	rno-miR-200a-5p	-0.217789	-0.733614
Apln	NONRATT001846.2	rno-miR-200a-5p	-0.721727	-0.526732
Apoa4	NONRATT001846.2	rno-miR-200a-5p	-0.948687	-0.48331
Arntl	NONRATT001846.2	rno-miR-200a-5p	-0.262664	-0.6622
Car13	NONRATT001846.2	rno-miR-200a-5p	-0.865206	-0.439335
Cldn22	NONRATT001846.2	rno-miR-200a-5p	-0.828342	-0.49216
Cplx1	NONRATT001846.2	rno-miR-200a-5p	-0.515031	-0.596914
Cstb	NONRATT001846.2	rno-miR-200a-5p	-0.920978	-0.405116
Cyp2f4	NONRATT001846.2	rno-miR-200a-5p	-0.714526	-0.430295
Dkkl1	NONRATT001846.2	rno-miR-200a-5p	-0.75238	-0.446205
Ephx1	NONRATT001846.2	rno-miR-200a-5p	-0.143171	-0.709421
Gas2l3	NONRATT001846.2	rno-miR-200a-5p	-0.99605	-0.382431
Gpnmb	NONRATT001846.2	rno-miR-200a-5p	-0.797019	-0.445698
Gpt2	NONRATT001846.2	rno-miR-200a-5p	-0.714704	-0.463936
Gstm1	NONRATT001846.2	rno-miR-200a-5p	-0.920775	-0.505141
Hcar2	NONRATT001846.2	rno-miR-200a-5p	-0.732904	-0.56866
Lingo4	NONRATT001846.2	rno-miR-200a-5p	-0.674044	-0.445412
LOC100360679	NONRATT001846.2	rno-miR-200a-5p	-0.555209	-0.607097
Lox	NONRATT001846.2	rno-miR-200a-5p	-1.10267	-0.413861
Lrrcc1	NONRATT001846.2	rno-miR-200a-5p	-0.483524	-0.509916
Mat1a	NONRATT001846.2	rno-miR-200a-5p	-0.47728	-0.616518
Mfsd2a	NONRATT001846.2	rno-miR-200a-5p	-0.749651	-0.46765
Plin1	NONRATT001846.2	rno-miR-200a-5p	-0.446541	-0.328396
RT1-A3	NONRATT001846.2	rno-miR-200a-5p	-0.350704	-0.379205
Slc16a1	NONRATT001846.2	rno-miR-200a-5p	-0.529054	-0.527951
Slc5a8	NONRATT001846.2	rno-miR-200a-5p	-0.633477	-0.439087
Steap1	NONRATT001846.2	rno-miR-200a-5p	-0.875887	-0.445549
Ucp1	NONRATT001846.2	rno-miR-200a-5p	-0.40461	-0.291202
AABR07007717.3	NONRATT001846.2	rno-miR-322-5p	-0.3671	-0.535325
Ak1	NONRATT001846.2	rno-miR-322-5p	-0.112679	-0.733614
Apln	NONRATT001846.2	rno-miR-322-5p	-0.385873	-0.526732
Apoa4	NONRATT001846.2	rno-miR-322-5p	-0.537606	-0.48331
Car13	NONRATT001846.2	rno-miR-322-5p	-0.555679	-0.439335
Cldn22	NONRATT001846.2	rno-miR-322-5p	-0.463528	-0.49216
Cndp1	NONRATT001846.2	rno-miR-322-5p	-0.150066	0.76579
Cplx1	NONRATT001846.2	rno-miR-322-5p	-0.216911	-0.596914
Cstb	NONRATT001846.2	rno-miR-322-5p	-0.640179	-0.405116
Cyp2f4	NONRATT001846.2	rno-miR-322-5p	-0.479254	-0.430295
Dkkl1	NONRATT001846.2	rno-miR-322-5p	-0.485996	-0.446205
Gas2l3	NONRATT001846.2	rno-miR-322-5p	-0.908356	-0.382431
Gpnmb	NONRATT001846.2	rno-miR-322-5p	-0.519284	-0.445698
Gpt2	NONRATT001846.2	rno-miR-322-5p	-0.451245	-0.463936
Gstm1	NONRATT001846.2	rno-miR-322-5p	-0.477651	-0.505141
Hcar2	NONRATT001846.2	rno-miR-322-5p	-0.25514	-0.56866
Lingo4	NONRATT001846.2	rno-miR-322-5p	-0.449055	-0.445412
Lox	NONRATT001846.2	rno-miR-322-5p	-0.77499	-0.413861
Lrrcc1	NONRATT001846.2	rno-miR-322-5p	-0.3654	-0.509916
Mat1a	NONRATT001846.2	rno-miR-322-5p	-0.136109	-0.616518
Mfsd2a	NONRATT001846.2	rno-miR-322-5p	-0.459189	-0.46765
Plin1	NONRATT001846.2	rno-miR-322-5p	-0.331711	-0.328396
RT1-A3	NONRATT001846.2	rno-miR-322-5p	-0.275963	-0.379205
Slc16a1	NONRATT001846.2	rno-miR-322-5p	-0.346478	-0.527951
Slc5a8	NONRATT001846.2	rno-miR-322-5p	-0.425874	-0.439087
Steap1	NONRATT001846.2	rno-miR-322-5p	-0.551279	-0.445549
Ucp1	NONRATT001846.2	rno-miR-322-5p	-0.301959	-0.291202
AABR07007717.3	NONRATT001846.2	rno-miR-374-5p	-0.495366	-0.535325
Ak1	NONRATT001846.2	rno-miR-374-5p	-0.157156	-0.733614
Apln	NONRATT001846.2	rno-miR-374-5p	-0.487971	-0.526732
Apoa4	NONRATT001846.2	rno-miR-374-5p	-0.629885	-0.48331
Arntl	NONRATT001846.2	rno-miR-374-5p	-0.306449	-0.6622
Car13	NONRATT001846.2	rno-miR-374-5p	-0.605419	-0.439335
Cldn22	NONRATT001846.2	rno-miR-374-5p	-0.520481	-0.49216
Cplx1	NONRATT001846.2	rno-miR-374-5p	-0.497944	-0.596914
Cstb	NONRATT001846.2	rno-miR-374-5p	-0.621904	-0.405116
Cyp2f4	NONRATT001846.2	rno-miR-374-5p	-0.505358	-0.430295
Dkkl1	NONRATT001846.2	rno-miR-374-5p	-0.513147	-0.446205
Ephx1	NONRATT001846.2	rno-miR-374-5p	-0.197869	-0.709421
Gas2l3	NONRATT001846.2	rno-miR-374-5p	-0.865182	-0.382431
Gpnmb	NONRATT001846.2	rno-miR-374-5p	-0.559698	-0.445698
Gpt2	NONRATT001846.2	rno-miR-374-5p	-0.517726	-0.463936
Gstm1	NONRATT001846.2	rno-miR-374-5p	-0.568807	-0.505141
Hcar2	NONRATT001846.2	rno-miR-374-5p	-0.536919	-0.56866
Lingo4	NONRATT001846.2	rno-miR-374-5p	-0.478848	-0.445412
LOC100360679	NONRATT001846.2	rno-miR-374-5p	-0.467165	-0.607097
Lox	NONRATT001846.2	rno-miR-374-5p	-0.758048	-0.413861
Lrrcc1	NONRATT001846.2	rno-miR-374-5p	-0.751927	-0.509916
Mat1a	NONRATT001846.2	rno-miR-374-5p	-0.427711	-0.616518
Mfsd2a	NONRATT001846.2	rno-miR-374-5p	-0.505436	-0.46765
Plin1	NONRATT001846.2	rno-miR-374-5p	-0.373205	-0.328396
RT1-A3	NONRATT001846.2	rno-miR-374-5p	-0.376878	-0.379205
Slc16a1	NONRATT001846.2	rno-miR-374-5p	-0.498733	-0.527951
Slc5a8	NONRATT001846.2	rno-miR-374-5p	-0.49345	-0.439087
Steap1	NONRATT001846.2	rno-miR-374-5p	-0.567551	-0.445549
Ucp1	NONRATT001846.2	rno-miR-374-5p	-0.3306	-0.291202
AABR07007717.3	NONRATT002323.2	rno-miR-122-5p	-0.151744	-0.611036
Ak1	NONRATT002323.2	rno-miR-122-5p	-0.144085	-0.620369
Apln	NONRATT002323.2	rno-miR-122-5p	-0.174141	-0.579864
Arntl	NONRATT002323.2	rno-miR-122-5p	-0.177189	-0.563764
Cldn22	NONRATT002323.2	rno-miR-122-5p	-0.163187	-0.584899
Cstb	NONRATT002323.2	rno-miR-122-5p	-0.122282	-0.660731
Cyp2f4	NONRATT002323.2	rno-miR-122-5p	-0.175956	-0.561957
Dkkl1	NONRATT002323.2	rno-miR-122-5p	-0.179535	-0.568832
Ephx1	NONRATT002323.2	rno-miR-122-5p	-0.166416	-0.581401
Gpnmb	NONRATT002323.2	rno-miR-122-5p	-0.147679	-0.617517
Gpt2	NONRATT002323.2	rno-miR-122-5p	-0.164274	-0.56599
Gstm1	NONRATT002323.2	rno-miR-122-5p	-0.123974	-0.6473
Lingo4	NONRATT002323.2	rno-miR-122-5p	-0.174229	-0.545101
Mfsd2a	NONRATT002323.2	rno-miR-122-5p	-0.175418	-0.551818
Plin1	NONRATT002323.2	rno-miR-122-5p	-0.588817	-0.398575
RT1-A3	NONRATT002323.2	rno-miR-122-5p	-0.286052	-0.470182
Steap1	NONRATT002323.2	rno-miR-122-5p	-0.148425	-0.615414
Ucp1	NONRATT002323.2	rno-miR-122-5p	-0.671647	-0.341233
AABR07007717.3	NONRATT002323.2	rno-miR-126a-5p	-0.788537	-0.611036
Ak1	NONRATT002323.2	rno-miR-126a-5p	-0.377785	-0.620369
Apln	NONRATT002323.2	rno-miR-126a-5p	-0.89888	-0.579864
Apoa4	NONRATT002323.2	rno-miR-126a-5p	-0.508244	-0.67014
Arntl	NONRATT002323.2	rno-miR-126a-5p	-1.3665	-0.563764
Car13	NONRATT002323.2	rno-miR-126a-5p	-0.557112	-0.634044
Cldn22	NONRATT002323.2	rno-miR-126a-5p	-0.852371	-0.584899
Cplx1	NONRATT002323.2	rno-miR-126a-5p	-0.346825	-0.719471
Cstb	NONRATT002323.2	rno-miR-126a-5p	-0.548831	-0.660731
Cyp2f4	NONRATT002323.2	rno-miR-126a-5p	-0.751886	-0.561957
Dkkl1	NONRATT002323.2	rno-miR-126a-5p	-0.792638	-0.568832
Ephx1	NONRATT002323.2	rno-miR-126a-5p	-0.954521	-0.581401
Gpnmb	NONRATT002323.2	rno-miR-126a-5p	-0.686181	-0.617517
Gpt2	NONRATT002323.2	rno-miR-126a-5p	-0.701558	-0.56599
Gstm1	NONRATT002323.2	rno-miR-126a-5p	-0.712961	-0.6473
Hcar2	NONRATT002323.2	rno-miR-126a-5p	-0.471055	-0.679903
Lingo4	NONRATT002323.2	rno-miR-126a-5p	-0.783063	-0.545101
LOC100360679	NONRATT002323.2	rno-miR-126a-5p	-0.332118	-0.715674
Lox	NONRATT002323.2	rno-miR-126a-5p	-0.318243	-0.726014
Lrrcc1	NONRATT002323.2	rno-miR-126a-5p	-0.131424	-0.852846
Mat1a	NONRATT002323.2	rno-miR-126a-5p	-0.404349	-0.69857
Mfsd2a	NONRATT002323.2	rno-miR-126a-5p	-0.757233	-0.551818
Plin1	NONRATT002323.2	rno-miR-126a-5p	-0.395176	-0.398575
RT1-A3	NONRATT002323.2	rno-miR-126a-5p	-0.263452	-0.470182
Slc16a1	NONRATT002323.2	rno-miR-126a-5p	-0.40299	-0.641173
Slc5a8	NONRATT002323.2	rno-miR-126a-5p	-0.585053	-0.535331
Steap1	NONRATT002323.2	rno-miR-126a-5p	-0.731497	-0.615414
Ucp1	NONRATT002323.2	rno-miR-126a-5p	-0.362941	-0.341233
AABR07007717.3	NONRATT002323.2	rno-miR-200a-5p	-0.612267	-0.611036
Ak1	NONRATT002323.2	rno-miR-200a-5p	-0.409551	-0.620369
Apln	NONRATT002323.2	rno-miR-200a-5p	-0.728935	-0.579864
Apoa4	NONRATT002323.2	rno-miR-200a-5p	-0.461665	-0.67014
Arntl	NONRATT002323.2	rno-miR-200a-5p	-1.03667	-0.563764
Car13	NONRATT002323.2	rno-miR-200a-5p	-0.530011	-0.634044
Cldn22	NONRATT002323.2	rno-miR-200a-5p	-0.718387	-0.584899
Cplx1	NONRATT002323.2	rno-miR-200a-5p	-0.304152	-0.719471
Cstb	NONRATT002323.2	rno-miR-200a-5p	-0.45807	-0.660731
Cyp2f4	NONRATT002323.2	rno-miR-200a-5p	-0.595435	-0.561957
Dkkl1	NONRATT002323.2	rno-miR-200a-5p	-0.628982	-0.568832
Ephx1	NONRATT002323.2	rno-miR-200a-5p	-0.801469	-0.581401
Gpnmb	NONRATT002323.2	rno-miR-200a-5p	-0.548633	-0.617517
Gpt2	NONRATT002323.2	rno-miR-200a-5p	-0.632222	-0.56599
Gstm1	NONRATT002323.2	rno-miR-200a-5p	-0.558868	-0.6473
Hcar2	NONRATT002323.2	rno-miR-200a-5p	-0.413269	-0.679903
Lingo4	NONRATT002323.2	rno-miR-200a-5p	-0.612756	-0.545101
LOC100360679	NONRATT002323.2	rno-miR-200a-5p	-0.17913	-0.715674
Lox	NONRATT002323.2	rno-miR-200a-5p	-0.271679	-0.726014
Lrrcc1	NONRATT002323.2	rno-miR-200a-5p	-0.120715	-0.852846
Mat1a	NONRATT002323.2	rno-miR-200a-5p	-0.35561	-0.69857
Mfsd2a	NONRATT002323.2	rno-miR-200a-5p	-0.69701	-0.551818
Plin1	NONRATT002323.2	rno-miR-200a-5p	-0.447504	-0.398575
RT1-A3	NONRATT002323.2	rno-miR-200a-5p	-0.332163	-0.470182
Slc16a1	NONRATT002323.2	rno-miR-200a-5p	-0.439349	-0.641173
Slc5a8	NONRATT002323.2	rno-miR-200a-5p	-0.58602	-0.535331
Steap1	NONRATT002323.2	rno-miR-200a-5p	-0.587839	-0.615414
Ucp1	NONRATT002323.2	rno-miR-200a-5p	-0.418618	-0.341233
AABR07007717.3	NONRATT002323.2	rno-miR-322-5p	-0.944654	-0.611036
Ak1	NONRATT002323.2	rno-miR-322-5p	-0.575189	-0.620369
Apln	NONRATT002323.2	rno-miR-322-5p	-1.04547	-0.579864
Apoa4	NONRATT002323.2	rno-miR-322-5p	-0.918181	-0.67014
Arntl	NONRATT002323.2	rno-miR-322-5p	-1.33529	-0.563764
Car13	NONRATT002323.2	rno-miR-322-5p	-0.855006	-0.634044
Cldn22	NONRATT002323.2	rno-miR-322-5p	-1.05094	-0.584899
Cplx1	NONRATT002323.2	rno-miR-322-5p	-0.677196	-0.719471
Cstb	NONRATT002323.2	rno-miR-322-5p	-0.798947	-0.660731
Cyp2f4	NONRATT002323.2	rno-miR-322-5p	-0.836188	-0.561957
Dkkl1	NONRATT002323.2	rno-miR-322-5p	-0.894258	-0.568832
Ephx1	NONRATT002323.2	rno-miR-322-5p	-1.1174	-0.581401
Gas2l3	NONRATT002323.2	rno-miR-322-5p	-0.238372	-0.82708
Gpnmb	NONRATT002323.2	rno-miR-322-5p	-0.851408	-0.617517
Gpt2	NONRATT002323.2	rno-miR-322-5p	-0.879302	-0.56599
Gstm1	NONRATT002323.2	rno-miR-322-5p	-1.03921	-0.6473
Hcar2	NONRATT002323.2	rno-miR-322-5p	-0.992607	-0.679903
Lingo4	NONRATT002323.2	rno-miR-322-5p	-0.844695	-0.545101
LOC100360679	NONRATT002323.2	rno-miR-322-5p	-0.900293	-0.715674
Lox	NONRATT002323.2	rno-miR-322-5p	-0.702136	-0.726014
Lrrcc1	NONRATT002323.2	rno-miR-322-5p	-0.238608	-0.852846
Mat1a	NONRATT002323.2	rno-miR-322-5p	-0.803271	-0.69857
Mfsd2a	NONRATT002323.2	rno-miR-322-5p	-0.954521	-0.551818
Plin1	NONRATT002323.2	rno-miR-322-5p	-0.553993	-0.398575
RT1-A3	NONRATT002323.2	rno-miR-322-5p	-0.423532	-0.470182
Slc16a1	NONRATT002323.2	rno-miR-322-5p	-0.672685	-0.641173
Slc5a8	NONRATT002323.2	rno-miR-322-5p	-0.78218	-0.535331
Steap1	NONRATT002323.2	rno-miR-322-5p	-0.925872	-0.615414
Ucp1	NONRATT002323.2	rno-miR-322-5p	-0.508698	-0.341233
AABR07007717.3	NONRATT002323.2	rno-miR-374-5p	-0.892393	-0.611036
Ak1	NONRATT002323.2	rno-miR-374-5p	-1.07683	-0.620369
Apln	NONRATT002323.2	rno-miR-374-5p	-0.909202	-0.579864
Apoa4	NONRATT002323.2	rno-miR-374-5p	-0.842523	-0.67014
Arntl	NONRATT002323.2	rno-miR-374-5p	-1.11806	-0.563764
Car13	NONRATT002323.2	rno-miR-374-5p	-0.782674	-0.634044
Cldn22	NONRATT002323.2	rno-miR-374-5p	-0.862595	-0.584899
Cplx1	NONRATT002323.2	rno-miR-374-5p	-1.02591	-0.719471
Cstb	NONRATT002323.2	rno-miR-374-5p	-0.685869	-0.660731
Cyp2f4	NONRATT002323.2	rno-miR-374-5p	-0.731933	-0.561957
Dkkl1	NONRATT002323.2	rno-miR-374-5p	-0.765671	-0.568832
Ephx1	NONRATT002323.2	rno-miR-374-5p	-1.26187	-0.581401
Gas2l3	NONRATT002323.2	rno-miR-374-5p	-0.426458	-0.82708
Gpnmb	NONRATT002323.2	rno-miR-374-5p	-0.756714	-0.617517
Gpt2	NONRATT002323.2	rno-miR-374-5p	-0.819335	-0.56599
Gstm1	NONRATT002323.2	rno-miR-374-5p	-0.861721	-0.6473
Hcar2	NONRATT002323.2	rno-miR-374-5p	-1.005	-0.679903
Lingo4	NONRATT002323.2	rno-miR-374-5p	-0.737524	-0.545101
LOC100360679	NONRATT002323.2	rno-miR-374-5p	-1.12003	-0.715674
Lox	NONRATT002323.2	rno-miR-374-5p	-0.691478	-0.726014
Lrrcc1	NONRATT002323.2	rno-miR-374-5p	-0.353762	-0.852846
Mat1a	NONRATT002323.2	rno-miR-374-5p	-1.1431	-0.69857
Mfsd2a	NONRATT002323.2	rno-miR-374-5p	-0.828997	-0.551818
Plin1	NONRATT002323.2	rno-miR-374-5p	-0.562799	-0.398575
RT1-A3	NONRATT002323.2	rno-miR-374-5p	-0.545342	-0.470182
Slc16a1	NONRATT002323.2	rno-miR-374-5p	-0.802979	-0.641173
Slc5a8	NONRATT002323.2	rno-miR-374-5p	-0.77032	-0.535331
Steap1	NONRATT002323.2	rno-miR-374-5p	-0.773849	-0.615414
Ucp1	NONRATT002323.2	rno-miR-374-5p	-0.506271	-0.341233
AABR07004993.1	NONRATT002685.2	rno-miR-122-5p	-0.217428	-0.591371
AY172581.9	NONRATT002685.2	rno-miR-122-5p	-0.123363	-0.577567
Car13	NONRATT002685.2	rno-miR-122-5p	-0.107797	0.851558
Cmah	NONRATT002685.2	rno-miR-122-5p	-0.102397	-0.780666
Cyp26b1	NONRATT002685.2	rno-miR-122-5p	-0.178577	-0.720048
Cyp2c11	NONRATT002685.2	rno-miR-122-5p	-0.142308	-0.652692
Dnah9	NONRATT002685.2	rno-miR-122-5p	-0.125979	-0.709727
Gjd2	NONRATT002685.2	rno-miR-122-5p	-0.109576	-0.829671
Il12rb1	NONRATT002685.2	rno-miR-122-5p	-0.203137	-0.732366
Irf2bp1	NONRATT002685.2	rno-miR-122-5p	-0.143701	-0.751048
Moap1	NONRATT002685.2	rno-miR-122-5p	-0.140663	-0.558943
Olr1668	NONRATT002685.2	rno-miR-122-5p	-0.106035	-0.626438
Pde4c	NONRATT002685.2	rno-miR-122-5p	-0.179473	-0.686932
Rcan2	NONRATT002685.2	rno-miR-122-5p	-0.300478	-0.5332
RT1-Ba	NONRATT002685.2	rno-miR-122-5p	-0.103001	-0.622233
RT1-Db1	NONRATT002685.2	rno-miR-122-5p	-0.238614	-0.551856
Shc3	NONRATT002685.2	rno-miR-122-5p	-0.151467	-0.549212
Slc5a8	NONRATT002685.2	rno-miR-122-5p	-0.138791	0.754208
Smim5	NONRATT002685.2	rno-miR-122-5p	-0.147633	-0.811168
Snhg11	NONRATT002685.2	rno-miR-122-5p	-0.147078	-0.810772
Sv2b	NONRATT002685.2	rno-miR-122-5p	-0.136814	-0.65374
Vtn	NONRATT002685.2	rno-miR-122-5p	-0.122039	-0.789222
Wipf3	NONRATT002685.2	rno-miR-122-5p	-0.160439	-0.773064
AABR07004993.1	NONRATT002685.2	rno-miR-126a-5p	-1.28533	-0.591371
AY172581.9	NONRATT002685.2	rno-miR-126a-5p	-0.226698	-0.577567
Cmah	NONRATT002685.2	rno-miR-126a-5p	-1.04917	-0.780666
Cndp1	NONRATT002685.2	rno-miR-126a-5p	-1.11597	-0.908743
Cyp26b1	NONRATT002685.2	rno-miR-126a-5p	-0.750617	-0.720048
Cyp2c11	NONRATT002685.2	rno-miR-126a-5p	-0.688995	-0.652692
Dnah9	NONRATT002685.2	rno-miR-126a-5p	-0.744966	-0.709727
Fst	NONRATT002685.2	rno-miR-126a-5p	-0.784382	-0.697208
Gjd2	NONRATT002685.2	rno-miR-126a-5p	-1.34511	-0.829671
Gng7	NONRATT002685.2	rno-miR-126a-5p	-0.996104	-0.92538
Il12rb1	NONRATT002685.2	rno-miR-126a-5p	-0.790418	-0.732366
Irf2bp1	NONRATT002685.2	rno-miR-126a-5p	-0.985597	-0.751048
Itk	NONRATT002685.2	rno-miR-126a-5p	-0.64831	-0.867697
Moap1	NONRATT002685.2	rno-miR-126a-5p	-0.247719	-0.558943
Olr1668	NONRATT002685.2	rno-miR-126a-5p	-0.876015	-0.626438
Pde4c	NONRATT002685.2	rno-miR-126a-5p	-1.25381	-0.686932
Ppp1r1a	NONRATT002685.2	rno-miR-126a-5p	-1.26383	-0.883272
Ppp1r1b	NONRATT002685.2	rno-miR-126a-5p	-0.600331	-0.67533
Prelid2	NONRATT002685.2	rno-miR-126a-5p	-1.2244	-0.859798
Rasd2	NONRATT002685.2	rno-miR-126a-5p	-0.718761	-0.808358
Rcan2	NONRATT002685.2	rno-miR-126a-5p	-0.949816	-0.5332
RT1-Ba	NONRATT002685.2	rno-miR-126a-5p	-1.12419	-0.622233
RT1-Db1	NONRATT002685.2	rno-miR-126a-5p	-1.32718	-0.551856
Shc3	NONRATT002685.2	rno-miR-126a-5p	-0.441536	-0.549212
Smim5	NONRATT002685.2	rno-miR-126a-5p	-0.947088	-0.811168
Snhg11	NONRATT002685.2	rno-miR-126a-5p	-1.12712	-0.810772
Sv2b	NONRATT002685.2	rno-miR-126a-5p	-0.587052	-0.65374
Tmem184b	NONRATT002685.2	rno-miR-126a-5p	-0.530167	-0.977181
Vtn	NONRATT002685.2	rno-miR-126a-5p	-0.634783	-0.789222
Wipf3	NONRATT002685.2	rno-miR-126a-5p	-1.0253	-0.773064
AABR07004993.1	NONRATT002685.2	rno-miR-200a-5p	-1.2626	-0.591371
AY172581.9	NONRATT002685.2	rno-miR-200a-5p	-0.286856	-0.577567
Cmah	NONRATT002685.2	rno-miR-200a-5p	-0.936473	-0.780666
Cndp1	NONRATT002685.2	rno-miR-200a-5p	-0.92293	-0.908743
Cyp26b1	NONRATT002685.2	rno-miR-200a-5p	-0.797349	-0.720048
Cyp2c11	NONRATT002685.2	rno-miR-200a-5p	-0.769107	-0.652692
Dnah9	NONRATT002685.2	rno-miR-200a-5p	-0.565651	-0.709727
Fst	NONRATT002685.2	rno-miR-200a-5p	-0.83948	-0.697208
Gjd2	NONRATT002685.2	rno-miR-200a-5p	-1.21618	-0.829671
Gng7	NONRATT002685.2	rno-miR-200a-5p	-0.716908	-0.92538
Il12rb1	NONRATT002685.2	rno-miR-200a-5p	-0.771882	-0.732366
Irf2bp1	NONRATT002685.2	rno-miR-200a-5p	-1.02103	-0.751048
Itk	NONRATT002685.2	rno-miR-200a-5p	-0.539917	-0.867697
Moap1	NONRATT002685.2	rno-miR-200a-5p	-0.256799	-0.558943
Olr1668	NONRATT002685.2	rno-miR-200a-5p	-0.833611	-0.626438
Pde4c	NONRATT002685.2	rno-miR-200a-5p	-1.04507	-0.686932
Ppp1r1a	NONRATT002685.2	rno-miR-200a-5p	-0.974374	-0.883272
Ppp1r1b	NONRATT002685.2	rno-miR-200a-5p	-0.508818	-0.67533
Prelid2	NONRATT002685.2	rno-miR-200a-5p	-1.13128	-0.859798
Rasd2	NONRATT002685.2	rno-miR-200a-5p	-0.698316	-0.808358
Rcan2	NONRATT002685.2	rno-miR-200a-5p	-0.976633	-0.5332
RT1-Ba	NONRATT002685.2	rno-miR-200a-5p	-1.03477	-0.622233
RT1-Db1	NONRATT002685.2	rno-miR-200a-5p	-1.29609	-0.551856
Shc3	NONRATT002685.2	rno-miR-200a-5p	-0.345749	-0.549212
Smim5	NONRATT002685.2	rno-miR-200a-5p	-0.852956	-0.811168
Snhg11	NONRATT002685.2	rno-miR-200a-5p	-0.937805	-0.810772
Sv2b	NONRATT002685.2	rno-miR-200a-5p	-0.512548	-0.65374
Tmem184b	NONRATT002685.2	rno-miR-200a-5p	-0.199886	-0.977181
Vtn	NONRATT002685.2	rno-miR-200a-5p	-0.6303	-0.789222
Wipf3	NONRATT002685.2	rno-miR-200a-5p	-1.06146	-0.773064
AABR07004993.1	NONRATT002685.2	rno-miR-322-5p	-1.42494	-0.591371
AY172581.9	NONRATT002685.2	rno-miR-322-5p	-0.217027	-0.577567
Cmah	NONRATT002685.2	rno-miR-322-5p	-1.19624	-0.780666
Cndp1	NONRATT002685.2	rno-miR-322-5p	-0.622738	-0.908743
Cyp26b1	NONRATT002685.2	rno-miR-322-5p	-0.539164	-0.720048
Cyp2c11	NONRATT002685.2	rno-miR-322-5p	-0.499955	-0.652692
Dnah9	NONRATT002685.2	rno-miR-322-5p	-0.9185	-0.709727
Fst	NONRATT002685.2	rno-miR-322-5p	-0.569703	-0.697208
Gjd2	NONRATT002685.2	rno-miR-322-5p	-1.36025	-0.829671
Gng7	NONRATT002685.2	rno-miR-322-5p	-0.734624	-0.92538
Il12rb1	NONRATT002685.2	rno-miR-322-5p	-0.724885	-0.732366
Irf2bp1	NONRATT002685.2	rno-miR-322-5p	-0.689437	-0.751048
Itk	NONRATT002685.2	rno-miR-322-5p	-0.622303	-0.867697
Moap1	NONRATT002685.2	rno-miR-322-5p	-0.334235	-0.558943
Olr1668	NONRATT002685.2	rno-miR-322-5p	-1.0885	-0.626438
Pde4c	NONRATT002685.2	rno-miR-322-5p	-1.3752	-0.686932
Ppp1r1a	NONRATT002685.2	rno-miR-322-5p	-1.33333	-0.883272
Ppp1r1b	NONRATT002685.2	rno-miR-322-5p	-0.806841	-0.67533
Prelid2	NONRATT002685.2	rno-miR-322-5p	-0.902321	-0.859798
Rasd2	NONRATT002685.2	rno-miR-322-5p	-0.687455	-0.808358
Rcan2	NONRATT002685.2	rno-miR-322-5p	-1.0422	-0.5332
RT1-Ba	NONRATT002685.2	rno-miR-322-5p	-1.08384	-0.622233
RT1-Db1	NONRATT002685.2	rno-miR-322-5p	-1.38781	-0.551856
Shc3	NONRATT002685.2	rno-miR-322-5p	-0.630448	-0.549212
Smim5	NONRATT002685.2	rno-miR-322-5p	-0.900419	-0.811168
Snhg11	NONRATT002685.2	rno-miR-322-5p	-1.2307	-0.810772
Sv2b	NONRATT002685.2	rno-miR-322-5p	-0.759542	-0.65374
Tmem184b	NONRATT002685.2	rno-miR-322-5p	-0.148722	-0.977181
Vtn	NONRATT002685.2	rno-miR-322-5p	-0.562942	-0.789222
Wipf3	NONRATT002685.2	rno-miR-322-5p	-0.758359	-0.773064
AABR07004993.1	NONRATT002685.2	rno-miR-374-5p	-1.0536	-0.591371
AY172581.9	NONRATT002685.2	rno-miR-374-5p	-0.743248	-0.577567
Cmah	NONRATT002685.2	rno-miR-374-5p	-1.12829	-0.780666
Cndp1	NONRATT002685.2	rno-miR-374-5p	-0.435834	-0.908743
Cyp26b1	NONRATT002685.2	rno-miR-374-5p	-0.741798	-0.720048
Cyp2c11	NONRATT002685.2	rno-miR-374-5p	-0.662542	-0.652692
Dnah9	NONRATT002685.2	rno-miR-374-5p	-0.86274	-0.709727
Fst	NONRATT002685.2	rno-miR-374-5p	-0.549542	-0.697208
Gjd2	NONRATT002685.2	rno-miR-374-5p	-0.787757	-0.829671
Gng7	NONRATT002685.2	rno-miR-374-5p	-0.36043	-0.92538
Il12rb1	NONRATT002685.2	rno-miR-374-5p	-1.21899	-0.732366
Irf2bp1	NONRATT002685.2	rno-miR-374-5p	-0.578444	-0.751048
Itk	NONRATT002685.2	rno-miR-374-5p	-0.925702	-0.867697
Moap1	NONRATT002685.2	rno-miR-374-5p	-0.89585	-0.558943
Olr1668	NONRATT002685.2	rno-miR-374-5p	-1.29119	-0.626438
Pde4c	NONRATT002685.2	rno-miR-374-5p	-0.70509	-0.686932
Ppp1r1a	NONRATT002685.2	rno-miR-374-5p	-0.690321	-0.883272
Ppp1r1b	NONRATT002685.2	rno-miR-374-5p	-1.09926	-0.67533
Prelid2	NONRATT002685.2	rno-miR-374-5p	-0.518285	-0.859798
Rasd2	NONRATT002685.2	rno-miR-374-5p	-1.11676	-0.808358
Rcan2	NONRATT002685.2	rno-miR-374-5p	-1.50462	-0.5332
RT1-Ba	NONRATT002685.2	rno-miR-374-5p	-0.526607	-0.622233
RT1-Db1	NONRATT002685.2	rno-miR-374-5p	-0.840013	-0.551856
Shc3	NONRATT002685.2	rno-miR-374-5p	-0.926345	-0.549212
Smim5	NONRATT002685.2	rno-miR-374-5p	-1.48131	-0.811168
Snhg11	NONRATT002685.2	rno-miR-374-5p	-1.28196	-0.810772
Sv2b	NONRATT002685.2	rno-miR-374-5p	-1.20343	-0.65374
Vtn	NONRATT002685.2	rno-miR-374-5p	-0.991865	-0.789222
Wipf3	NONRATT002685.2	rno-miR-374-5p	-0.761758	-0.773064
AABR07007717.3	NONRATT003829.2	rno-miR-122-5p	-0.199357	-0.177761
Ak1	NONRATT003829.2	rno-miR-122-5p	-0.455957	0.458744
Apln	NONRATT003829.2	rno-miR-122-5p	-0.199342	-0.241863
Apoa4	NONRATT003829.2	rno-miR-122-5p	-0.381265	-0.138926
Arntl	NONRATT003829.2	rno-miR-122-5p	-0.258482	-0.0278722
Car13	NONRATT003829.2	rno-miR-122-5p	-0.327496	-0.211833
Cldn22	NONRATT003829.2	rno-miR-122-5p	-0.192515	-0.262512
Cplx1	NONRATT003829.2	rno-miR-122-5p	-0.618903	0.162393
Cstb	NONRATT003829.2	rno-miR-122-5p	-0.171234	-0.213641
Cyp2f4	NONRATT003829.2	rno-miR-122-5p	-0.125188	-0.321452
Dkkl1	NONRATT003829.2	rno-miR-122-5p	-0.134619	-0.313545
Ephx1	NONRATT003829.2	rno-miR-122-5p	-0.277451	0.0233305
Gas2l3	NONRATT003829.2	rno-miR-122-5p	-0.260025	0.190706
Gpnmb	NONRATT003829.2	rno-miR-122-5p	-0.160958	-0.254793
Gpt2	NONRATT003829.2	rno-miR-122-5p	-0.142251	-0.313279
Gstm1	NONRATT003829.2	rno-miR-122-5p	-0.235122	-0.160931
Hcar2	NONRATT003829.2	rno-miR-122-5p	-0.328657	-0.0605545
Lingo4	NONRATT003829.2	rno-miR-122-5p	-0.125475	-0.303882
LOC100360679	NONRATT003829.2	rno-miR-122-5p	-0.496666	0.127064
Lox	NONRATT003829.2	rno-miR-122-5p	-0.400352	-0.111804
Lrrcc1	NONRATT003829.2	rno-miR-122-5p	-0.217012	0.455994
Mat1a	NONRATT003829.2	rno-miR-122-5p	-0.575088	0.110396
Mfsd2a	NONRATT003829.2	rno-miR-122-5p	-0.141774	-0.311401
Plin1	NONRATT003829.2	rno-miR-122-5p	-0.515288	-0.180022
RT1-A3	NONRATT003829.2	rno-miR-122-5p	-0.605108	0.199265
Slc16a1	NONRATT003829.2	rno-miR-122-5p	-0.758697	0.188917
Slc5a8	NONRATT003829.2	rno-miR-122-5p	-0.224361	-0.27175
Steap1	NONRATT003829.2	rno-miR-122-5p	-0.168774	-0.265628
Ucp1	NONRATT003829.2	rno-miR-122-5p	-0.376763	-0.203213
Ak1	NONRATT003829.2	rno-miR-126a-5p	-0.271261	0.458744
Cplx1	NONRATT003829.2	rno-miR-126a-5p	-0.294477	0.162393
Ephx1	NONRATT003829.2	rno-miR-126a-5p	-0.183937	0.0233305
Gas2l3	NONRATT003829.2	rno-miR-126a-5p	-0.394139	0.190706
LOC100360679	NONRATT003829.2	rno-miR-126a-5p	-0.444707	0.127064
Lrrcc1	NONRATT003829.2	rno-miR-126a-5p	-0.378831	0.455994
Mat1a	NONRATT003829.2	rno-miR-126a-5p	-0.275591	0.110396
Slc16a1	NONRATT003829.2	rno-miR-126a-5p	-0.166411	0.188917
Ak1	NONRATT003829.2	rno-miR-200a-5p	-0.274264	0.458744
Cplx1	NONRATT003829.2	rno-miR-200a-5p	-0.236114	0.162393
Gas2l3	NONRATT003829.2	rno-miR-200a-5p	-0.237943	0.190706
LOC100360679	NONRATT003829.2	rno-miR-200a-5p	-0.392359	0.127064
Lrrcc1	NONRATT003829.2	rno-miR-200a-5p	-0.288368	0.455994
Mat1a	NONRATT003829.2	rno-miR-200a-5p	-0.17525	0.110396
Slc16a1	NONRATT003829.2	rno-miR-200a-5p	-0.133914	0.188917
Ak1	NONRATT003829.2	rno-miR-322-5p	-0.204685	0.458744
Cplx1	NONRATT003829.2	rno-miR-322-5p	-0.10645	0.162393
Gas2l3	NONRATT003829.2	rno-miR-322-5p	-0.241133	0.190706
LOC100360679	NONRATT003829.2	rno-miR-322-5p	-0.137658	0.127064
Lrrcc1	NONRATT003829.2	rno-miR-322-5p	-0.305442	0.455994
Tmem184b	NONRATT003829.2	rno-miR-322-5p	-0.247914	-0.0271028
AY172581.9	NONRATT003829.2	rno-miR-374-5p	-0.139372	-0.322667
Cndp1	NONRATT003829.2	rno-miR-374-5p	-0.594466	-0.0890939
Cyp26b1	NONRATT003829.2	rno-miR-374-5p	-0.174699	-0.295612
Cyp2c11	NONRATT003829.2	rno-miR-374-5p	-0.108115	-0.388279
Dnah9	NONRATT003829.2	rno-miR-374-5p	-0.224934	-0.24642
Fst	NONRATT003829.2	rno-miR-374-5p	-0.109325	-0.386134
Gjd2	NONRATT003829.2	rno-miR-374-5p	-0.113169	-0.343605
Gng7	NONRATT003829.2	rno-miR-374-5p	-0.287443	-0.269235
Il12rb1	NONRATT003829.2	rno-miR-374-5p	-0.139708	-0.32899
Irf2bp1	NONRATT003829.2	rno-miR-374-5p	-0.17158	-0.292293
Itk	NONRATT003829.2	rno-miR-374-5p	-0.148262	-0.304253
Lrrcc1	NONRATT003829.2	rno-miR-374-5p	-0.188885	0.455994
Moap1	NONRATT003829.2	rno-miR-374-5p	-0.144663	-0.322292
Pde4c	NONRATT003829.2	rno-miR-374-5p	-0.225194	-0.206454
Ppp1r1a	NONRATT003829.2	rno-miR-374-5p	-0.345663	-0.24645
Prelid2	NONRATT003829.2	rno-miR-374-5p	-0.218967	-0.271039
RT1-Ba	NONRATT003829.2	rno-miR-374-5p	-0.127779	-0.333533
Shc3	NONRATT003829.2	rno-miR-374-5p	-0.172307	-0.273717
Smim5	NONRATT003829.2	rno-miR-374-5p	-0.115973	-0.312307
Snhg11	NONRATT003829.2	rno-miR-374-5p	-0.262025	-0.274594
Tmem184b	NONRATT003829.2	rno-miR-374-5p	-0.903382	-0.0271028
Wipf3	NONRATT003829.2	rno-miR-374-5p	-0.160566	-0.318375
AABR07007717.3	NONRATT004044.2	rno-miR-122-5p	-0.110873	-0.893759
Ak1	NONRATT004044.2	rno-miR-122-5p	-0.102162	-0.891435
Apln	NONRATT004044.2	rno-miR-122-5p	-0.143103	-0.880233
Cldn22	NONRATT004044.2	rno-miR-122-5p	-0.15261	-0.871658
Cstb	NONRATT004044.2	rno-miR-122-5p	-0.12432	-0.868911
Cyp2f4	NONRATT004044.2	rno-miR-122-5p	-0.175506	-0.815469
Dkkl1	NONRATT004044.2	rno-miR-122-5p	-0.18123	-0.832588
Gpnmb	NONRATT004044.2	rno-miR-122-5p	-0.143988	-0.861067
Gpt2	NONRATT004044.2	rno-miR-122-5p	-0.186722	-0.842303
Gstm1	NONRATT004044.2	rno-miR-122-5p	-0.10125	-0.911074
Lingo4	NONRATT004044.2	rno-miR-122-5p	-0.157556	-0.806683
Mfsd2a	NONRATT004044.2	rno-miR-122-5p	-0.182323	-0.838044
Plin1	NONRATT004044.2	rno-miR-122-5p	-1.10402	-0.60324
RT1-A3	NONRATT004044.2	rno-miR-122-5p	-0.563091	-0.616805
Slc16a1	NONRATT004044.2	rno-miR-122-5p	-0.153904	-0.86162
Steap1	NONRATT004044.2	rno-miR-122-5p	-0.155994	-0.866266
Ucp1	NONRATT004044.2	rno-miR-122-5p	-1.18211	-0.537218
AABR07007717.3	NONRATT004044.2	rno-miR-126a-5p	-1.16156	-0.893759
Apln	NONRATT004044.2	rno-miR-126a-5p	-1.2561	-0.880233
Apoa4	NONRATT004044.2	rno-miR-126a-5p	-0.784411	-0.916239
Arntl	NONRATT004044.2	rno-miR-126a-5p	-1.31137	-0.912521
Car13	NONRATT004044.2	rno-miR-126a-5p	-0.848415	-0.87357
Cldn22	NONRATT004044.2	rno-miR-126a-5p	-1.28905	-0.871658
Cplx1	NONRATT004044.2	rno-miR-126a-5p	-0.213688	-0.963156
Cstb	NONRATT004044.2	rno-miR-126a-5p	-1.28752	-0.868911
Cyp2f4	NONRATT004044.2	rno-miR-126a-5p	-1.29775	-0.815469
Dkkl1	NONRATT004044.2	rno-miR-126a-5p	-1.34272	-0.832588
Ephx1	NONRATT004044.2	rno-miR-126a-5p	-0.712553	-0.935421
Gas2l3	NONRATT004044.2	rno-miR-126a-5p	-0.52251	-0.927274
Gpnmb	NONRATT004044.2	rno-miR-126a-5p	-1.25827	-0.861067
Gpt2	NONRATT004044.2	rno-miR-126a-5p	-1.00085	-0.842303
Gstm1	NONRATT004044.2	rno-miR-126a-5p	-1.31028	-0.911074
Hcar2	NONRATT004044.2	rno-miR-126a-5p	-0.537875	-0.953585
Lingo4	NONRATT004044.2	rno-miR-126a-5p	-1.32586	-0.806683
LOC100360679	NONRATT004044.2	rno-miR-126a-5p	-0.211179	-0.977139
Lox	NONRATT004044.2	rno-miR-126a-5p	-0.697861	-0.917819
Mat1a	NONRATT004044.2	rno-miR-126a-5p	-0.252001	-0.967194
Mfsd2a	NONRATT004044.2	rno-miR-126a-5p	-1.08621	-0.838044
Plin1	NONRATT004044.2	rno-miR-126a-5p	-0.455682	-0.60324
RT1-A3	NONRATT004044.2	rno-miR-126a-5p	-0.134069	-0.616805
Slc16a1	NONRATT004044.2	rno-miR-126a-5p	-0.354362	-0.86162
Slc5a8	NONRATT004044.2	rno-miR-126a-5p	-0.758216	-0.79762
Steap1	NONRATT004044.2	rno-miR-126a-5p	-1.34388	-0.866266
Ucp1	NONRATT004044.2	rno-miR-126a-5p	-0.42178	-0.537218
AABR07007717.3	NONRATT004044.2	rno-miR-200a-5p	-0.860575	-0.893759
Ak1	NONRATT004044.2	rno-miR-200a-5p	-0.215612	-0.891435
Apln	NONRATT004044.2	rno-miR-200a-5p	-1.05127	-0.880233
Apoa4	NONRATT004044.2	rno-miR-200a-5p	-0.864322	-0.916239
Arntl	NONRATT004044.2	rno-miR-200a-5p	-1.16102	-0.912521
Car13	NONRATT004044.2	rno-miR-200a-5p	-0.929625	-0.87357
Cldn22	NONRATT004044.2	rno-miR-200a-5p	-1.14138	-0.871658
Cplx1	NONRATT004044.2	rno-miR-200a-5p	-0.314165	-0.963156
Cstb	NONRATT004044.2	rno-miR-200a-5p	-0.925003	-0.868911
Cyp2f4	NONRATT004044.2	rno-miR-200a-5p	-0.951188	-0.815469
Dkkl1	NONRATT004044.2	rno-miR-200a-5p	-1.01123	-0.832588
Ephx1	NONRATT004044.2	rno-miR-200a-5p	-0.67459	-0.935421
Gas2l3	NONRATT004044.2	rno-miR-200a-5p	-0.523879	-0.927274
Gpnmb	NONRATT004044.2	rno-miR-200a-5p	-0.918776	-0.861067
Gpt2	NONRATT004044.2	rno-miR-200a-5p	-0.940747	-0.842303
Gstm1	NONRATT004044.2	rno-miR-200a-5p	-0.98983	-0.911074
Hcar2	NONRATT004044.2	rno-miR-200a-5p	-0.56462	-0.953585
Lingo4	NONRATT004044.2	rno-miR-200a-5p	-0.958701	-0.806683
LOC100360679	NONRATT004044.2	rno-miR-200a-5p	-0.214381	-0.977139
Lox	NONRATT004044.2	rno-miR-200a-5p	-0.771101	-0.917819
Mat1a	NONRATT004044.2	rno-miR-200a-5p	-0.332633	-0.967194
Mfsd2a	NONRATT004044.2	rno-miR-200a-5p	-1.0752	-0.838044
Moap1	NONRATT004044.2	rno-miR-200a-5p	-0.162437	0.713795
Plin1	NONRATT004044.2	rno-miR-200a-5p	-0.678548	-0.60324
RT1-A3	NONRATT004044.2	rno-miR-200a-5p	-0.399852	-0.616805
Shc3	NONRATT004044.2	rno-miR-200a-5p	-0.161043	0.735539
Slc16a1	NONRATT004044.2	rno-miR-200a-5p	-0.6111	-0.86162
Slc5a8	NONRATT004044.2	rno-miR-200a-5p	-0.865038	-0.79762
Steap1	NONRATT004044.2	rno-miR-200a-5p	-1.03128	-0.866266
Sv2b	NONRATT004044.2	rno-miR-200a-5p	-0.125838	0.855613
Ucp1	NONRATT004044.2	rno-miR-200a-5p	-0.648885	-0.537218
AABR07007717.3	NONRATT004044.2	rno-miR-322-5p	-0.903156	-0.893759
Ak1	NONRATT004044.2	rno-miR-322-5p	-0.130025	-0.891435
Apln	NONRATT004044.2	rno-miR-322-5p	-1.04405	-0.880233
Apoa4	NONRATT004044.2	rno-miR-322-5p	-1.03099	-0.916239
Arntl	NONRATT004044.2	rno-miR-322-5p	-1.04616	-0.912521
AY172581.9	NONRATT004044.2	rno-miR-322-5p	-0.200917	0.675577
Car13	NONRATT004044.2	rno-miR-322-5p	-1.03931	-0.87357
Cldn22	NONRATT004044.2	rno-miR-322-5p	-1.16592	-0.871658
Cplx1	NONRATT004044.2	rno-miR-322-5p	-0.377309	-0.963156
Cstb	NONRATT004044.2	rno-miR-322-5p	-1.14395	-0.868911
Cyp2f4	NONRATT004044.2	rno-miR-322-5p	-1.00583	-0.815469
Dkkl1	NONRATT004044.2	rno-miR-322-5p	-1.06316	-0.832588
Ephx1	NONRATT004044.2	rno-miR-322-5p	-0.613233	-0.935421
Gas2l3	NONRATT004044.2	rno-miR-322-5p	-1.00948	-0.927274
Gpnmb	NONRATT004044.2	rno-miR-322-5p	-1.0246	-0.861067
Gpt2	NONRATT004044.2	rno-miR-322-5p	-0.94002	-0.842303
Gstm1	NONRATT004044.2	rno-miR-322-5p	-1.14357	-0.911074
Hcar2	NONRATT004044.2	rno-miR-322-5p	-0.715834	-0.953585
Lingo4	NONRATT004044.2	rno-miR-322-5p	-1.00139	-0.806683
LOC100360679	NONRATT004044.2	rno-miR-322-5p	-0.410763	-0.977139
Lox	NONRATT004044.2	rno-miR-322-5p	-1.08139	-0.917819
Mat1a	NONRATT004044.2	rno-miR-322-5p	-0.401965	-0.967194
Mfsd2a	NONRATT004044.2	rno-miR-322-5p	-1.06839	-0.838044
Moap1	NONRATT004044.2	rno-miR-322-5p	-0.237994	0.713795
Plin1	NONRATT004044.2	rno-miR-322-5p	-0.664495	-0.60324
RT1-A3	NONRATT004044.2	rno-miR-322-5p	-0.405384	-0.616805
Slc16a1	NONRATT004044.2	rno-miR-322-5p	-0.682844	-0.86162
Slc5a8	NONRATT004044.2	rno-miR-322-5p	-0.854088	-0.79762
Steap1	NONRATT004044.2	rno-miR-322-5p	-1.14696	-0.866266
Ucp1	NONRATT004044.2	rno-miR-322-5p	-0.627348	-0.537218
Ak1	NONRATT004044.2	rno-miR-374-5p	-1.69021	-0.891435
Apoa4	NONRATT004044.2	rno-miR-374-5p	-0.150128	-0.916239
Arntl	NONRATT004044.2	rno-miR-374-5p	-0.180769	-0.912521
Car13	NONRATT004044.2	rno-miR-374-5p	-0.182818	-0.87357
Cplx1	NONRATT004044.2	rno-miR-374-5p	-0.806611	-0.963156
Ephx1	NONRATT004044.2	rno-miR-374-5p	-0.381097	-0.935421
Gas2l3	NONRATT004044.2	rno-miR-374-5p	-0.195119	-0.927274
Gpt2	NONRATT004044.2	rno-miR-374-5p	-0.141967	-0.842303
Hcar2	NONRATT004044.2	rno-miR-374-5p	-0.115381	-0.953585
LOC100360679	NONRATT004044.2	rno-miR-374-5p	-0.376306	-0.977139
Lox	NONRATT004044.2	rno-miR-374-5p	-0.122921	-0.917819
Lrrcc1	NONRATT004044.2	rno-miR-374-5p	-1.27648	-0.943391
Mat1a	NONRATT004044.2	rno-miR-374-5p	-0.631908	-0.967194
Mfsd2a	NONRATT004044.2	rno-miR-374-5p	-0.109201	-0.838044
Plin1	NONRATT004044.2	rno-miR-374-5p	-0.469717	-0.60324
RT1-A3	NONRATT004044.2	rno-miR-374-5p	-0.886114	-0.616805
Slc16a1	NONRATT004044.2	rno-miR-374-5p	-0.857395	-0.86162
Slc5a8	NONRATT004044.2	rno-miR-374-5p	-0.330027	-0.79762
Ucp1	NONRATT004044.2	rno-miR-374-5p	-0.419883	-0.537218
AABR07007717.3	NONRATT004914.2	rno-miR-122-5p	-0.157587	-0.539158
Apln	NONRATT004914.2	rno-miR-122-5p	-0.162356	-0.533457
Apoa4	NONRATT004914.2	rno-miR-122-5p	-0.182322	-0.498382
Car13	NONRATT004914.2	rno-miR-122-5p	-0.24953	-0.45292
Cldn22	NONRATT004914.2	rno-miR-122-5p	-0.189182	-0.502667
Cstb	NONRATT004914.2	rno-miR-122-5p	-0.217229	-0.415733
Cyp2f4	NONRATT004914.2	rno-miR-122-5p	-0.209288	-0.431268
Dkkl1	NONRATT004914.2	rno-miR-122-5p	-0.213168	-0.449876
Gas2l3	NONRATT004914.2	rno-miR-122-5p	-0.184078	-0.414705
Gpnmb	NONRATT004914.2	rno-miR-122-5p	-0.208137	-0.450244
Gpt2	NONRATT004914.2	rno-miR-122-5p	-0.230638	-0.466557
Gstm1	NONRATT004914.2	rno-miR-122-5p	-0.175619	-0.517658
Hcar2	NONRATT004914.2	rno-miR-122-5p	-0.125847	-0.578233
Lingo4	NONRATT004914.2	rno-miR-122-5p	-0.1878	-0.44676
Lox	NONRATT004914.2	rno-miR-122-5p	-0.278672	-0.432625
Lrrcc1	NONRATT004914.2	rno-miR-122-5p	-0.111609	-0.516243
Mfsd2a	NONRATT004914.2	rno-miR-122-5p	-0.213057	-0.475911
Plin1	NONRATT004914.2	rno-miR-122-5p	-0.600852	-0.343761
RT1-A3	NONRATT004914.2	rno-miR-122-5p	-0.293135	-0.400159
Slc16a1	NONRATT004914.2	rno-miR-122-5p	-0.109587	-0.556023
Slc5a8	NONRATT004914.2	rno-miR-122-5p	-0.224053	-0.44592
Steap1	NONRATT004914.2	rno-miR-122-5p	-0.220928	-0.454199
Ucp1	NONRATT004914.2	rno-miR-122-5p	-0.616911	-0.306796
AABR07007717.3	NONRATT004914.2	rno-miR-126a-5p	-0.721015	-0.539158
Ak1	NONRATT004914.2	rno-miR-126a-5p	-0.18439	-0.74214
Apln	NONRATT004914.2	rno-miR-126a-5p	-0.723911	-0.533457
Apoa4	NONRATT004914.2	rno-miR-126a-5p	-0.796031	-0.498382
Car13	NONRATT004914.2	rno-miR-126a-5p	-0.753707	-0.45292
Cldn22	NONRATT004914.2	rno-miR-126a-5p	-0.816421	-0.502667
Cplx1	NONRATT004914.2	rno-miR-126a-5p	-0.395371	-0.612797
Cstb	NONRATT004914.2	rno-miR-126a-5p	-1.10824	-0.415733
Cyp2f4	NONRATT004914.2	rno-miR-126a-5p	-0.823798	-0.431268
Dkkl1	NONRATT004914.2	rno-miR-126a-5p	-0.851706	-0.449876
Gas2l3	NONRATT004914.2	rno-miR-126a-5p	-0.879125	-0.414705
Gpnmb	NONRATT004914.2	rno-miR-126a-5p	-0.927747	-0.450244
Gpt2	NONRATT004914.2	rno-miR-126a-5p	-0.699439	-0.466557
Gstm1	NONRATT004914.2	rno-miR-126a-5p	-1.04904	-0.517658
Hcar2	NONRATT004914.2	rno-miR-126a-5p	-0.630104	-0.578233
Lingo4	NONRATT004914.2	rno-miR-126a-5p	-0.775177	-0.44676
LOC100360679	NONRATT004914.2	rno-miR-126a-5p	-0.367439	-0.626865
Lox	NONRATT004914.2	rno-miR-126a-5p	-0.936686	-0.432625
Lrrcc1	NONRATT004914.2	rno-miR-126a-5p	-0.451777	-0.516243
Mat1a	NONRATT004914.2	rno-miR-126a-5p	-0.363268	-0.630595
Mfsd2a	NONRATT004914.2	rno-miR-126a-5p	-0.701192	-0.475911
Plin1	NONRATT004914.2	rno-miR-126a-5p	-0.360063	-0.343761
RT1-A3	NONRATT004914.2	rno-miR-126a-5p	-0.257281	-0.400159
Slc16a1	NONRATT004914.2	rno-miR-126a-5p	-0.393822	-0.556023
Slc5a8	NONRATT004914.2	rno-miR-126a-5p	-0.56077	-0.44592
Steap1	NONRATT004914.2	rno-miR-126a-5p	-0.991058	-0.454199
Ucp1	NONRATT004914.2	rno-miR-126a-5p	-0.321993	-0.306796
AABR07007717.3	NONRATT004914.2	rno-miR-200a-5p	-0.743835	-0.539158
Ak1	NONRATT004914.2	rno-miR-200a-5p	-0.236769	-0.74214
Apln	NONRATT004914.2	rno-miR-200a-5p	-0.795106	-0.533457
Apoa4	NONRATT004914.2	rno-miR-200a-5p	-1.01014	-0.498382
Arntl	NONRATT004914.2	rno-miR-200a-5p	-0.309792	-0.678837
Car13	NONRATT004914.2	rno-miR-200a-5p	-0.917632	-0.45292
Cldn22	NONRATT004914.2	rno-miR-200a-5p	-0.894522	-0.502667
Cplx1	NONRATT004914.2	rno-miR-200a-5p	-0.553635	-0.612797
Cstb	NONRATT004914.2	rno-miR-200a-5p	-0.981345	-0.415733
Cyp2f4	NONRATT004914.2	rno-miR-200a-5p	-0.776284	-0.431268
Dkkl1	NONRATT004914.2	rno-miR-200a-5p	-0.816314	-0.449876
Ephx1	NONRATT004914.2	rno-miR-200a-5p	-0.212619	-0.715854
Gas2l3	NONRATT004914.2	rno-miR-200a-5p	-1.00727	-0.414705
Gpnmb	NONRATT004914.2	rno-miR-200a-5p	-0.864534	-0.450244
Gpt2	NONRATT004914.2	rno-miR-200a-5p	-0.779017	-0.466557
Gstm1	NONRATT004914.2	rno-miR-200a-5p	-0.995058	-0.517658
Hcar2	NONRATT004914.2	rno-miR-200a-5p	-0.828721	-0.578233
Lingo4	NONRATT004914.2	rno-miR-200a-5p	-0.732202	-0.44676
LOC100360679	NONRATT004914.2	rno-miR-200a-5p	-0.597522	-0.626865
Lox	NONRATT004914.2	rno-miR-200a-5p	-1.15361	-0.432625
Lrrcc1	NONRATT004914.2	rno-miR-200a-5p	-0.518076	-0.516243
Mat1a	NONRATT004914.2	rno-miR-200a-5p	-0.52759	-0.630595
Mfsd2a	NONRATT004914.2	rno-miR-200a-5p	-0.807248	-0.475911
Plin1	NONRATT004914.2	rno-miR-200a-5p	-0.464857	-0.343761
RT1-A3	NONRATT004914.2	rno-miR-200a-5p	-0.359731	-0.400159
Slc16a1	NONRATT004914.2	rno-miR-200a-5p	-0.537334	-0.556023
Slc5a8	NONRATT004914.2	rno-miR-200a-5p	-0.67771	-0.44592
Steap1	NONRATT004914.2	rno-miR-200a-5p	-0.942596	-0.454199
Ucp1	NONRATT004914.2	rno-miR-200a-5p	-0.420441	-0.306796
AABR07007717.3	NONRATT004914.2	rno-miR-322-5p	-0.428028	-0.539158
Ak1	NONRATT004914.2	rno-miR-322-5p	-0.132483	-0.74214
Apln	NONRATT004914.2	rno-miR-322-5p	-0.441661	-0.533457
Apoa4	NONRATT004914.2	rno-miR-322-5p	-0.589229	-0.498382
Car13	NONRATT004914.2	rno-miR-322-5p	-0.59984	-0.45292
Cldn22	NONRATT004914.2	rno-miR-322-5p	-0.514407	-0.502667
Cndp1	NONRATT004914.2	rno-miR-322-5p	-0.115266	0.776698
Cplx1	NONRATT004914.2	rno-miR-322-5p	-0.253869	-0.612797
Cstb	NONRATT004914.2	rno-miR-322-5p	-0.69436	-0.415733
Cyp2f4	NONRATT004914.2	rno-miR-322-5p	-0.53068	-0.431268
Dkkl1	NONRATT004914.2	rno-miR-322-5p	-0.53837	-0.449876
Gas2l3	NONRATT004914.2	rno-miR-322-5p	-0.913162	-0.414705
Gpnmb	NONRATT004914.2	rno-miR-322-5p	-0.576677	-0.450244
Gpt2	NONRATT004914.2	rno-miR-322-5p	-0.50279	-0.466557
Gstm1	NONRATT004914.2	rno-miR-322-5p	-0.537591	-0.517658
Hcar2	NONRATT004914.2	rno-miR-322-5p	-0.331666	-0.578233
Lingo4	NONRATT004914.2	rno-miR-322-5p	-0.497372	-0.44676
Lox	NONRATT004914.2	rno-miR-322-5p	-0.822679	-0.432625
Lrrcc1	NONRATT004914.2	rno-miR-322-5p	-0.404257	-0.516243
Mat1a	NONRATT004914.2	rno-miR-322-5p	-0.181211	-0.630595
Mfsd2a	NONRATT004914.2	rno-miR-322-5p	-0.504445	-0.475911
Plin1	NONRATT004914.2	rno-miR-322-5p	-0.347865	-0.343761
RT1-A3	NONRATT004914.2	rno-miR-322-5p	-0.285823	-0.400159
Slc16a1	NONRATT004914.2	rno-miR-322-5p	-0.355641	-0.556023
Slc5a8	NONRATT004914.2	rno-miR-322-5p	-0.462407	-0.44592
Steap1	NONRATT004914.2	rno-miR-322-5p	-0.606605	-0.454199
Ucp1	NONRATT004914.2	rno-miR-322-5p	-0.315882	-0.306796
AABR07007717.3	NONRATT004914.2	rno-miR-374-5p	-0.511791	-0.539158
Ak1	NONRATT004914.2	rno-miR-374-5p	-0.162774	-0.74214
Apln	NONRATT004914.2	rno-miR-374-5p	-0.499296	-0.533457
Apoa4	NONRATT004914.2	rno-miR-374-5p	-0.629778	-0.498382
Arntl	NONRATT004914.2	rno-miR-374-5p	-0.298748	-0.678837
Car13	NONRATT004914.2	rno-miR-374-5p	-0.609025	-0.45292
Cldn22	NONRATT004914.2	rno-miR-374-5p	-0.526966	-0.502667
Cplx1	NONRATT004914.2	rno-miR-374-5p	-0.485078	-0.612797
Cstb	NONRATT004914.2	rno-miR-374-5p	-0.630013	-0.415733
Cyp2f4	NONRATT004914.2	rno-miR-374-5p	-0.521372	-0.431268
Dkkl1	NONRATT004914.2	rno-miR-374-5p	-0.527044	-0.449876
Ephx1	NONRATT004914.2	rno-miR-374-5p	-0.209345	-0.715854
Gas2l3	NONRATT004914.2	rno-miR-374-5p	-0.832818	-0.414705
Gpnmb	NONRATT004914.2	rno-miR-374-5p	-0.574397	-0.450244
Gpt2	NONRATT004914.2	rno-miR-374-5p	-0.53353	-0.466557
Gstm1	NONRATT004914.2	rno-miR-374-5p	-0.572704	-0.517658
Hcar2	NONRATT004914.2	rno-miR-374-5p	-0.546371	-0.578233
Lingo4	NONRATT004914.2	rno-miR-374-5p	-0.49365	-0.44676
LOC100360679	NONRATT004914.2	rno-miR-374-5p	-0.435144	-0.626865
Lox	NONRATT004914.2	rno-miR-374-5p	-0.753026	-0.432625
Lrrcc1	NONRATT004914.2	rno-miR-374-5p	-0.774892	-0.516243
Mat1a	NONRATT004914.2	rno-miR-374-5p	-0.420346	-0.630595
Mfsd2a	NONRATT004914.2	rno-miR-374-5p	-0.514254	-0.475911
Plin1	NONRATT004914.2	rno-miR-374-5p	-0.374522	-0.343761
RT1-A3	NONRATT004914.2	rno-miR-374-5p	-0.374313	-0.400159
Slc16a1	NONRATT004914.2	rno-miR-374-5p	-0.478602	-0.556023
Slc5a8	NONRATT004914.2	rno-miR-374-5p	-0.503206	-0.44592
Steap1	NONRATT004914.2	rno-miR-374-5p	-0.577254	-0.454199
Ucp1	NONRATT004914.2	rno-miR-374-5p	-0.331517	-0.306796
AABR07007717.3	NONRATT005775.2	rno-miR-122-5p	-0.157655	-0.779769
Apln	NONRATT005775.2	rno-miR-122-5p	-0.184135	-0.759579
Cldn22	NONRATT005775.2	rno-miR-122-5p	-0.195838	-0.74695
Cstb	NONRATT005775.2	rno-miR-122-5p	-0.183491	-0.735567
Cyp2f4	NONRATT005775.2	rno-miR-122-5p	-0.23393	-0.666415
Dkkl1	NONRATT005775.2	rno-miR-122-5p	-0.23713	-0.688181
Gpnmb	NONRATT005775.2	rno-miR-122-5p	-0.203107	-0.722303
Gpt2	NONRATT005775.2	rno-miR-122-5p	-0.259431	-0.698595
Gstm1	NONRATT005775.2	rno-miR-122-5p	-0.142105	-0.801689
Lingo4	NONRATT005775.2	rno-miR-122-5p	-0.212273	-0.666359
Mfsd2a	NONRATT005775.2	rno-miR-122-5p	-0.241805	-0.703858
Plin1	NONRATT005775.2	rno-miR-122-5p	-0.83962	-0.526537
RT1-A3	NONRATT005775.2	rno-miR-122-5p	-0.355177	-0.625477
Slc5a8	NONRATT005775.2	rno-miR-122-5p	-0.177016	-0.672267
Steap1	NONRATT005775.2	rno-miR-122-5p	-0.211557	-0.72984
Ucp1	NONRATT005775.2	rno-miR-122-5p	-0.925791	-0.463412
AABR07007717.3	NONRATT005775.2	rno-miR-126a-5p	-1.36686	-0.779769
Apln	NONRATT005775.2	rno-miR-126a-5p	-1.45549	-0.759579
Apoa4	NONRATT005775.2	rno-miR-126a-5p	-1.01751	-0.809052
Arntl	NONRATT005775.2	rno-miR-126a-5p	-0.860063	-0.865426
Car13	NONRATT005775.2	rno-miR-126a-5p	-1.05041	-0.751295
Cldn22	NONRATT005775.2	rno-miR-126a-5p	-1.48339	-0.74695
Cplx1	NONRATT005775.2	rno-miR-126a-5p	-0.282584	-0.926347
Cstb	NONRATT005775.2	rno-miR-126a-5p	-1.52787	-0.735567
Cyp2f4	NONRATT005775.2	rno-miR-126a-5p	-1.46892	-0.666415
Dkkl1	NONRATT005775.2	rno-miR-126a-5p	-1.52983	-0.688181
Ephx1	NONRATT005775.2	rno-miR-126a-5p	-0.553563	-0.889179
Gas2l3	NONRATT005775.2	rno-miR-126a-5p	-0.510391	-0.880005
Gpnmb	NONRATT005775.2	rno-miR-126a-5p	-1.50086	-0.722303
Gpt2	NONRATT005775.2	rno-miR-126a-5p	-1.22237	-0.698595
Gstm1	NONRATT005775.2	rno-miR-126a-5p	-1.62172	-0.801689
Hcar2	NONRATT005775.2	rno-miR-126a-5p	-0.875415	-0.862907
Lingo4	NONRATT005775.2	rno-miR-126a-5p	-1.43858	-0.666359
LOC100360679	NONRATT005775.2	rno-miR-126a-5p	-0.206158	-0.937704
Lox	NONRATT005775.2	rno-miR-126a-5p	-0.961662	-0.80578
Lrrcc1	NONRATT005775.2	rno-miR-126a-5p	-0.153662	-0.934076
Mat1a	NONRATT005775.2	rno-miR-126a-5p	-0.322356	-0.92146
Mfsd2a	NONRATT005775.2	rno-miR-126a-5p	-1.25253	-0.703858
Plin1	NONRATT005775.2	rno-miR-126a-5p	-0.517965	-0.526537
RT1-A3	NONRATT005775.2	rno-miR-126a-5p	-0.191151	-0.625477
Slc16a1	NONRATT005775.2	rno-miR-126a-5p	-0.339135	-0.854177
Slc5a8	NONRATT005775.2	rno-miR-126a-5p	-0.90281	-0.672267
Steap1	NONRATT005775.2	rno-miR-126a-5p	-1.59725	-0.72984
Ucp1	NONRATT005775.2	rno-miR-126a-5p	-0.475501	-0.463412
AABR07007717.3	NONRATT005775.2	rno-miR-200a-5p	-1.23498	-0.779769
Apln	NONRATT005775.2	rno-miR-200a-5p	-1.4433	-0.759579
Apoa4	NONRATT005775.2	rno-miR-200a-5p	-1.30363	-0.809052
Arntl	NONRATT005775.2	rno-miR-200a-5p	-1.07703	-0.865426
Car13	NONRATT005775.2	rno-miR-200a-5p	-1.292	-0.751295
Cldn22	NONRATT005775.2	rno-miR-200a-5p	-1.53872	-0.74695
Cplx1	NONRATT005775.2	rno-miR-200a-5p	-0.406217	-0.926347
Cstb	NONRATT005775.2	rno-miR-200a-5p	-1.32982	-0.735567
Cyp2f4	NONRATT005775.2	rno-miR-200a-5p	-1.30291	-0.666415
Dkkl1	NONRATT005775.2	rno-miR-200a-5p	-1.38011	-0.688181
Ephx1	NONRATT005775.2	rno-miR-200a-5p	-0.718468	-0.889179
Gas2l3	NONRATT005775.2	rno-miR-200a-5p	-0.615114	-0.880005
Gpnmb	NONRATT005775.2	rno-miR-200a-5p	-1.32652	-0.722303
Gpt2	NONRATT005775.2	rno-miR-200a-5p	-1.32502	-0.698595
Gstm1	NONRATT005775.2	rno-miR-200a-5p	-1.45513	-0.801689
Hcar2	NONRATT005775.2	rno-miR-200a-5p	-1.08716	-0.862907
Lingo4	NONRATT005775.2	rno-miR-200a-5p	-1.26177	-0.666359
LOC100360679	NONRATT005775.2	rno-miR-200a-5p	-0.309813	-0.937704
Lox	NONRATT005775.2	rno-miR-200a-5p	-1.22257	-0.80578
Lrrcc1	NONRATT005775.2	rno-miR-200a-5p	-0.13985	-0.934076
Mat1a	NONRATT005775.2	rno-miR-200a-5p	-0.471972	-0.92146
Mfsd2a	NONRATT005775.2	rno-miR-200a-5p	-1.41296	-0.703858
Plin1	NONRATT005775.2	rno-miR-200a-5p	-0.72676	-0.526537
RT1-A3	NONRATT005775.2	rno-miR-200a-5p	-0.362858	-0.625477
Slc16a1	NONRATT005775.2	rno-miR-200a-5p	-0.520549	-0.854177
Slc5a8	NONRATT005775.2	rno-miR-200a-5p	-1.10796	-0.672267
Steap1	NONRATT005775.2	rno-miR-200a-5p	-1.45848	-0.72984
Ucp1	NONRATT005775.2	rno-miR-200a-5p	-0.681219	-0.463412
AABR07007717.3	NONRATT005775.2	rno-miR-322-5p	-1.16982	-0.779769
Apln	NONRATT005775.2	rno-miR-322-5p	-1.28933	-0.759579
Apoa4	NONRATT005775.2	rno-miR-322-5p	-1.30708	-0.809052
Arntl	NONRATT005775.2	rno-miR-322-5p	-0.883827	-0.865426
Car13	NONRATT005775.2	rno-miR-322-5p	-1.27834	-0.751295
Cldn22	NONRATT005775.2	rno-miR-322-5p	-1.3915	-0.74695
Cplx1	NONRATT005775.2	rno-miR-322-5p	-0.436923	-0.926347
Cstb	NONRATT005775.2	rno-miR-322-5p	-1.4126	-0.735567
Cyp2f4	NONRATT005775.2	rno-miR-322-5p	-1.26263	-0.666415
Dkkl1	NONRATT005775.2	rno-miR-322-5p	-1.31806	-0.688181
Ephx1	NONRATT005775.2	rno-miR-322-5p	-0.638162	-0.889179
Gas2l3	NONRATT005775.2	rno-miR-322-5p	-0.85458	-0.880005
Gpnmb	NONRATT005775.2	rno-miR-322-5p	-1.31926	-0.722303
Gpt2	NONRATT005775.2	rno-miR-322-5p	-1.23407	-0.698595
Gstm1	NONRATT005775.2	rno-miR-322-5p	-1.40447	-0.801689
Hcar2	NONRATT005775.2	rno-miR-322-5p	-1.067	-0.862907
Lingo4	NONRATT005775.2	rno-miR-322-5p	-1.21353	-0.666359
LOC100360679	NONRATT005775.2	rno-miR-322-5p	-0.367005	-0.937704
Lox	NONRATT005775.2	rno-miR-322-5p	-1.3979	-0.80578
Lrrcc1	NONRATT005775.2	rno-miR-322-5p	-0.217861	-0.934076
Mat1a	NONRATT005775.2	rno-miR-322-5p	-0.497977	-0.92146
Mfsd2a	NONRATT005775.2	rno-miR-322-5p	-1.28798	-0.703858
Plin1	NONRATT005775.2	rno-miR-322-5p	-0.688861	-0.526537
RT1-A3	NONRATT005775.2	rno-miR-322-5p	-0.368182	-0.625477
Slc16a1	NONRATT005775.2	rno-miR-322-5p	-0.53906	-0.854177
Slc5a8	NONRATT005775.2	rno-miR-322-5p	-1.04311	-0.672267
Steap1	NONRATT005775.2	rno-miR-322-5p	-1.42443	-0.72984
Ucp1	NONRATT005775.2	rno-miR-322-5p	-0.638134	-0.463412
AABR07007717.3	NONRATT005775.2	rno-miR-374-5p	-1.26922	-0.779769
Ak1	NONRATT005775.2	rno-miR-374-5p	-0.364625	-0.944158
Apln	NONRATT005775.2	rno-miR-374-5p	-1.2693	-0.759579
Apoa4	NONRATT005775.2	rno-miR-374-5p	-1.32478	-0.809052
Arntl	NONRATT005775.2	rno-miR-374-5p	-0.852338	-0.865426
Car13	NONRATT005775.2	rno-miR-374-5p	-1.30212	-0.751295
Cldn22	NONRATT005775.2	rno-miR-374-5p	-1.25975	-0.74695
Cplx1	NONRATT005775.2	rno-miR-374-5p	-0.999343	-0.926347
Cstb	NONRATT005775.2	rno-miR-374-5p	-1.27299	-0.735567
Cyp2f4	NONRATT005775.2	rno-miR-374-5p	-1.24432	-0.666415
Dkkl1	NONRATT005775.2	rno-miR-374-5p	-1.25801	-0.688181
Ephx1	NONRATT005775.2	rno-miR-374-5p	-0.934849	-0.889179
Gas2l3	NONRATT005775.2	rno-miR-374-5p	-0.878319	-0.880005
Gpnmb	NONRATT005775.2	rno-miR-374-5p	-1.30278	-0.722303
Gpt2	NONRATT005775.2	rno-miR-374-5p	-1.33603	-0.698595
Gstm1	NONRATT005775.2	rno-miR-374-5p	-1.26518	-0.801689
Hcar2	NONRATT005775.2	rno-miR-374-5p	-1.3494	-0.862907
Lingo4	NONRATT005775.2	rno-miR-374-5p	-1.18014	-0.666359
LOC100360679	NONRATT005775.2	rno-miR-374-5p	-0.946345	-0.937704
Lox	NONRATT005775.2	rno-miR-374-5p	-1.35996	-0.80578
Lrrcc1	NONRATT005775.2	rno-miR-374-5p	-0.769255	-0.934076
Mat1a	NONRATT005775.2	rno-miR-374-5p	-1.08082	-0.92146
Mfsd2a	NONRATT005775.2	rno-miR-374-5p	-1.25905	-0.703858
Plin1	NONRATT005775.2	rno-miR-374-5p	-0.781983	-0.526537
RT1-A3	NONRATT005775.2	rno-miR-374-5p	-0.553801	-0.625477
Slc16a1	NONRATT005775.2	rno-miR-374-5p	-0.70699	-0.854177
Slc5a8	NONRATT005775.2	rno-miR-374-5p	-1.19585	-0.672267
Steap1	NONRATT005775.2	rno-miR-374-5p	-1.29532	-0.72984
Ucp1	NONRATT005775.2	rno-miR-374-5p	-0.703371	-0.463412
AABR07007717.3	NONRATT006078.2	rno-miR-122-5p	-0.146671	-0.554425
Ak1	NONRATT006078.2	rno-miR-122-5p	-0.161145	-0.521283
Apln	NONRATT006078.2	rno-miR-122-5p	-0.156604	-0.536483
Arntl	NONRATT006078.2	rno-miR-122-5p	-0.121009	-0.600396
Cldn22	NONRATT006078.2	rno-miR-122-5p	-0.125267	-0.560033
Cstb	NONRATT006078.2	rno-miR-122-5p	-0.100237	-0.641443
Cyp2f4	NONRATT006078.2	rno-miR-122-5p	-0.169981	-0.504388
Dkkl1	NONRATT006078.2	rno-miR-122-5p	-0.166987	-0.521825
Ephx1	NONRATT006078.2	rno-miR-122-5p	-0.151302	-0.542493
Gpnmb	NONRATT006078.2	rno-miR-122-5p	-0.140109	-0.565731
Gpt2	NONRATT006078.2	rno-miR-122-5p	-0.206426	-0.479737
Lingo4	NONRATT006078.2	rno-miR-122-5p	-0.16299	-0.500041
Mfsd2a	NONRATT006078.2	rno-miR-122-5p	-0.160254	-0.504148
Plin1	NONRATT006078.2	rno-miR-122-5p	-0.543915	-0.357352
RT1-A3	NONRATT006078.2	rno-miR-122-5p	-0.257957	-0.431411
Slc5a8	NONRATT006078.2	rno-miR-122-5p	-0.179705	-0.452943
Steap1	NONRATT006078.2	rno-miR-122-5p	-0.125439	-0.584041
Ucp1	NONRATT006078.2	rno-miR-122-5p	-0.604856	-0.308379
AABR07007717.3	NONRATT006078.2	rno-miR-126a-5p	-1.17064	-0.554425
Ak1	NONRATT006078.2	rno-miR-126a-5p	-0.51342	-0.521283
Apln	NONRATT006078.2	rno-miR-126a-5p	-1.20475	-0.536483
Apoa4	NONRATT006078.2	rno-miR-126a-5p	-0.7267	-0.636446
Arntl	NONRATT006078.2	rno-miR-126a-5p	-1.28292	-0.600396
Car13	NONRATT006078.2	rno-miR-126a-5p	-0.734077	-0.590896
Cldn22	NONRATT006078.2	rno-miR-126a-5p	-1.06464	-0.560033
Cplx1	NONRATT006078.2	rno-miR-126a-5p	-0.541106	-0.661189
Cstb	NONRATT006078.2	rno-miR-126a-5p	-0.723319	-0.641443
Cyp2f4	NONRATT006078.2	rno-miR-126a-5p	-0.982055	-0.504388
Dkkl1	NONRATT006078.2	rno-miR-126a-5p	-1.02524	-0.521825
Ephx1	NONRATT006078.2	rno-miR-126a-5p	-1.28013	-0.542493
Gpnmb	NONRATT006078.2	rno-miR-126a-5p	-0.965533	-0.565731
Gpt2	NONRATT006078.2	rno-miR-126a-5p	-0.977645	-0.479737
Gstm1	NONRATT006078.2	rno-miR-126a-5p	-1.01793	-0.6314
Hcar2	NONRATT006078.2	rno-miR-126a-5p	-1.05038	-0.625679
Lingo4	NONRATT006078.2	rno-miR-126a-5p	-0.976239	-0.500041
LOC100360679	NONRATT006078.2	rno-miR-126a-5p	-0.487952	-0.701263
Lox	NONRATT006078.2	rno-miR-126a-5p	-0.477758	-0.700617
Lrrcc1	NONRATT006078.2	rno-miR-126a-5p	-0.322137	-0.732965
Mat1a	NONRATT006078.2	rno-miR-126a-5p	-0.645938	-0.64069
Mfsd2a	NONRATT006078.2	rno-miR-126a-5p	-0.95239	-0.504148
Plin1	NONRATT006078.2	rno-miR-126a-5p	-0.445997	-0.357352
RT1-A3	NONRATT006078.2	rno-miR-126a-5p	-0.298036	-0.431411
Slc16a1	NONRATT006078.2	rno-miR-126a-5p	-0.417976	-0.655079
Slc5a8	NONRATT006078.2	rno-miR-126a-5p	-0.755273	-0.452943
Steap1	NONRATT006078.2	rno-miR-126a-5p	-0.966309	-0.584041
Ucp1	NONRATT006078.2	rno-miR-126a-5p	-0.402353	-0.308379
AABR07007717.3	NONRATT006078.2	rno-miR-200a-5p	-0.941693	-0.554425
Ak1	NONRATT006078.2	rno-miR-200a-5p	-0.612661	-0.521283
Apln	NONRATT006078.2	rno-miR-200a-5p	-1.051	-0.536483
Apoa4	NONRATT006078.2	rno-miR-200a-5p	-0.78877	-0.636446
Arntl	NONRATT006078.2	rno-miR-200a-5p	-1.13165	-0.600396
Car13	NONRATT006078.2	rno-miR-200a-5p	-0.787629	-0.590896
Cldn22	NONRATT006078.2	rno-miR-200a-5p	-0.982342	-0.560033
Cplx1	NONRATT006078.2	rno-miR-200a-5p	-0.635166	-0.661189
Cstb	NONRATT006078.2	rno-miR-200a-5p	-0.63849	-0.641443
Cyp2f4	NONRATT006078.2	rno-miR-200a-5p	-0.817965	-0.504388
Dkkl1	NONRATT006078.2	rno-miR-200a-5p	-0.86074	-0.521825
Ephx1	NONRATT006078.2	rno-miR-200a-5p	-1.17951	-0.542493
Gpnmb	NONRATT006078.2	rno-miR-200a-5p	-0.805126	-0.565731
Gpt2	NONRATT006078.2	rno-miR-200a-5p	-0.949445	-0.479737
Gstm1	NONRATT006078.2	rno-miR-200a-5p	-0.846781	-0.6314
Hcar2	NONRATT006078.2	rno-miR-200a-5p	-0.973853	-0.625679
Lingo4	NONRATT006078.2	rno-miR-200a-5p	-0.806636	-0.500041
LOC100360679	NONRATT006078.2	rno-miR-200a-5p	-0.559398	-0.701263
Lox	NONRATT006078.2	rno-miR-200a-5p	-0.520965	-0.700617
Lrrcc1	NONRATT006078.2	rno-miR-200a-5p	-0.333115	-0.732965
Mat1a	NONRATT006078.2	rno-miR-200a-5p	-0.7705	-0.64069
Mfsd2a	NONRATT006078.2	rno-miR-200a-5p	-0.954592	-0.504148
Plin1	NONRATT006078.2	rno-miR-200a-5p	-0.535717	-0.357352
RT1-A3	NONRATT006078.2	rno-miR-200a-5p	-0.396122	-0.431411
Slc16a1	NONRATT006078.2	rno-miR-200a-5p	-0.506005	-0.655079
Slc5a8	NONRATT006078.2	rno-miR-200a-5p	-0.821072	-0.452943
Steap1	NONRATT006078.2	rno-miR-200a-5p	-0.827866	-0.584041
Ucp1	NONRATT006078.2	rno-miR-200a-5p	-0.49051	-0.308379
AABR07007717.3	NONRATT006078.2	rno-miR-322-5p	-1.24386	-0.554425
Ak1	NONRATT006078.2	rno-miR-322-5p	-0.794257	-0.521283
Apln	NONRATT006078.2	rno-miR-322-5p	-1.31163	-0.536483
Apoa4	NONRATT006078.2	rno-miR-322-5p	-1.2169	-0.636446
Arntl	NONRATT006078.2	rno-miR-322-5p	-1.34977	-0.600396
Car13	NONRATT006078.2	rno-miR-322-5p	-1.09696	-0.590896
Cldn22	NONRATT006078.2	rno-miR-322-5p	-1.26268	-0.560033
Cplx1	NONRATT006078.2	rno-miR-322-5p	-1.0249	-0.661189
Cstb	NONRATT006078.2	rno-miR-322-5p	-0.970451	-0.641443
Cyp2f4	NONRATT006078.2	rno-miR-322-5p	-1.05002	-0.504388
Dkkl1	NONRATT006078.2	rno-miR-322-5p	-1.10781	-0.521825
Ephx1	NONRATT006078.2	rno-miR-322-5p	-1.39677	-0.542493
Gpnmb	NONRATT006078.2	rno-miR-322-5p	-1.09925	-0.565731
Gpt2	NONRATT006078.2	rno-miR-322-5p	-1.17976	-0.479737
Gstm1	NONRATT006078.2	rno-miR-322-5p	-1.27488	-0.6314
Hcar2	NONRATT006078.2	rno-miR-322-5p	-1.4852	-0.625679
Lingo4	NONRATT006078.2	rno-miR-322-5p	-1.02587	-0.500041
LOC100360679	NONRATT006078.2	rno-miR-322-5p	-1.24314	-0.701263
Lox	NONRATT006078.2	rno-miR-322-5p	-0.967004	-0.700617
Lrrcc1	NONRATT006078.2	rno-miR-322-5p	-0.532363	-0.732965
Mat1a	NONRATT006078.2	rno-miR-322-5p	-1.20576	-0.64069
Mfsd2a	NONRATT006078.2	rno-miR-322-5p	-1.17944	-0.504148
Plin1	NONRATT006078.2	rno-miR-322-5p	-0.640098	-0.357352
RT1-A3	NONRATT006078.2	rno-miR-322-5p	-0.489943	-0.431411
Slc16a1	NONRATT006078.2	rno-miR-322-5p	-0.716981	-0.655079
Slc5a8	NONRATT006078.2	rno-miR-322-5p	-1.01201	-0.452943
Steap1	NONRATT006078.2	rno-miR-322-5p	-1.14172	-0.584041
Ucp1	NONRATT006078.2	rno-miR-322-5p	-0.577539	-0.308379
AABR07007717.3	NONRATT006078.2	rno-miR-374-5p	-0.724351	-0.554425
Ak1	NONRATT006078.2	rno-miR-374-5p	-0.958013	-0.521283
Apln	NONRATT006078.2	rno-miR-374-5p	-0.718307	-0.536483
Apoa4	NONRATT006078.2	rno-miR-374-5p	-0.625246	-0.636446
Arntl	NONRATT006078.2	rno-miR-374-5p	-0.69576	-0.600396
Car13	NONRATT006078.2	rno-miR-374-5p	-0.620043	-0.590896
Cldn22	NONRATT006078.2	rno-miR-374-5p	-0.654876	-0.560033
Cplx1	NONRATT006078.2	rno-miR-374-5p	-0.759164	-0.661189
Cstb	NONRATT006078.2	rno-miR-374-5p	-0.51187	-0.641443
Cyp2f4	NONRATT006078.2	rno-miR-374-5p	-0.61432	-0.504388
Dkkl1	NONRATT006078.2	rno-miR-374-5p	-0.624465	-0.521825
Ephx1	NONRATT006078.2	rno-miR-374-5p	-0.9474	-0.542493
Gpnmb	NONRATT006078.2	rno-miR-374-5p	-0.619425	-0.565731
Gpt2	NONRATT006078.2	rno-miR-374-5p	-0.720019	-0.479737
Gstm1	NONRATT006078.2	rno-miR-374-5p	-0.612348	-0.6314
Hcar2	NONRATT006078.2	rno-miR-374-5p	-0.769801	-0.625679
Lingo4	NONRATT006078.2	rno-miR-374-5p	-0.6036	-0.500041
LOC100360679	NONRATT006078.2	rno-miR-374-5p	-0.607652	-0.701263
Lox	NONRATT006078.2	rno-miR-374-5p	-0.486452	-0.700617
Lrrcc1	NONRATT006078.2	rno-miR-374-5p	-0.454499	-0.732965
Mat1a	NONRATT006078.2	rno-miR-374-5p	-0.851314	-0.64069
Mfsd2a	NONRATT006078.2	rno-miR-374-5p	-0.672227	-0.504148
Plin1	NONRATT006078.2	rno-miR-374-5p	-0.471556	-0.357352
RT1-A3	NONRATT006078.2	rno-miR-374-5p	-0.458844	-0.431411
Slc16a1	NONRATT006078.2	rno-miR-374-5p	-0.528827	-0.655079
Slc5a8	NONRATT006078.2	rno-miR-374-5p	-0.674772	-0.452943
Steap1	NONRATT006078.2	rno-miR-374-5p	-0.599701	-0.584041
Ucp1	NONRATT006078.2	rno-miR-374-5p	-0.420828	-0.308379
AY172581.9	NONRATT006933.2	rno-miR-122-5p	-0.128264	-0.552688
Cndp1	NONRATT006933.2	rno-miR-122-5p	-0.114174	-0.937604
Cyp26b1	NONRATT006933.2	rno-miR-122-5p	-0.217852	-0.74362
Cyp2c11	NONRATT006933.2	rno-miR-122-5p	-0.142651	-0.652132
Il12rb1	NONRATT006933.2	rno-miR-122-5p	-0.175483	-0.842082
Irf2bp1	NONRATT006933.2	rno-miR-122-5p	-0.147361	-0.765081
Lrrcc1	NONRATT006933.2	rno-miR-122-5p	-0.104323	0.854642
Moap1	NONRATT006933.2	rno-miR-122-5p	-0.103941	-0.598729
Rcan2	NONRATT006933.2	rno-miR-122-5p	-0.169155	-0.785116
Wipf3	NONRATT006933.2	rno-miR-122-5p	-0.159569	-0.827176
AABR07004993.1	NONRATT006933.2	rno-miR-126a-5p	-0.164097	-0.818536
AY172581.9	NONRATT006933.2	rno-miR-126a-5p	-0.342614	-0.552688
Cmah	NONRATT006933.2	rno-miR-126a-5p	-0.28904	-0.895923
Cndp1	NONRATT006933.2	rno-miR-126a-5p	-0.625558	-0.937604
Cyp26b1	NONRATT006933.2	rno-miR-126a-5p	-0.585054	-0.74362
Cyp2c11	NONRATT006933.2	rno-miR-126a-5p	-0.635824	-0.652132
Dnah9	NONRATT006933.2	rno-miR-126a-5p	-0.209189	-0.821916
Fst	NONRATT006933.2	rno-miR-126a-5p	-0.808995	-0.673755
Gjd2	NONRATT006933.2	rno-miR-126a-5p	-0.422325	-0.927733
Gng7	NONRATT006933.2	rno-miR-126a-5p	-0.522839	-0.951999
Il12rb1	NONRATT006933.2	rno-miR-126a-5p	-0.229578	-0.842082
Irf2bp1	NONRATT006933.2	rno-miR-126a-5p	-0.798948	-0.765081
Itk	NONRATT006933.2	rno-miR-126a-5p	-0.378504	-0.904536
Moap1	NONRATT006933.2	rno-miR-126a-5p	-0.154431	-0.598729
Olr1668	NONRATT006933.2	rno-miR-126a-5p	-0.139206	-0.791865
Pde4c	NONRATT006933.2	rno-miR-126a-5p	-0.318737	-0.846776
Ppp1r1a	NONRATT006933.2	rno-miR-126a-5p	-0.239055	-0.971352
Ppp1r1b	NONRATT006933.2	rno-miR-126a-5p	-0.177307	-0.777077
Prelid2	NONRATT006933.2	rno-miR-126a-5p	-0.824487	-0.886221
Rasd2	NONRATT006933.2	rno-miR-126a-5p	-0.440306	-0.851457
RT1-A3	NONRATT006933.2	rno-miR-126a-5p	-0.17621	0.700819
RT1-Ba	NONRATT006933.2	rno-miR-126a-5p	-0.606428	-0.711058
RT1-Db1	NONRATT006933.2	rno-miR-126a-5p	-0.24487	-0.775412
Smim5	NONRATT006933.2	rno-miR-126a-5p	-0.172933	-0.927405
Tmem184b	NONRATT006933.2	rno-miR-126a-5p	-0.621413	-0.961733
Vtn	NONRATT006933.2	rno-miR-126a-5p	-0.447726	-0.820975
Wipf3	NONRATT006933.2	rno-miR-126a-5p	-0.612242	-0.827176
AABR07004993.1	NONRATT006933.2	rno-miR-200a-5p	-0.386076	-0.818536
AY172581.9	NONRATT006933.2	rno-miR-200a-5p	-0.340797	-0.552688
Cmah	NONRATT006933.2	rno-miR-200a-5p	-0.370426	-0.895923
Cndp1	NONRATT006933.2	rno-miR-200a-5p	-0.954112	-0.937604
Cyp26b1	NONRATT006933.2	rno-miR-200a-5p	-0.851532	-0.74362
Cyp2c11	NONRATT006933.2	rno-miR-200a-5p	-0.955119	-0.652132
Fst	NONRATT006933.2	rno-miR-200a-5p	-1.19093	-0.673755
Gjd2	NONRATT006933.2	rno-miR-200a-5p	-0.656291	-0.927733
Gng7	NONRATT006933.2	rno-miR-200a-5p	-0.682744	-0.951999
Il12rb1	NONRATT006933.2	rno-miR-200a-5p	-0.297961	-0.842082
Irf2bp1	NONRATT006933.2	rno-miR-200a-5p	-1.24177	-0.765081
Itk	NONRATT006933.2	rno-miR-200a-5p	-0.339321	-0.904536
Olr1668	NONRATT006933.2	rno-miR-200a-5p	-0.200421	-0.791865
Pde4c	NONRATT006933.2	rno-miR-200a-5p	-0.376194	-0.846776
Ppp1r1a	NONRATT006933.2	rno-miR-200a-5p	-0.298022	-0.971352
Prelid2	NONRATT006933.2	rno-miR-200a-5p	-1.29558	-0.886221
Rasd2	NONRATT006933.2	rno-miR-200a-5p	-0.550303	-0.851457
RT1-Ba	NONRATT006933.2	rno-miR-200a-5p	-0.865938	-0.711058
RT1-Db1	NONRATT006933.2	rno-miR-200a-5p	-0.517276	-0.775412
Smim5	NONRATT006933.2	rno-miR-200a-5p	-0.2041	-0.927405
Tmem184b	NONRATT006933.2	rno-miR-200a-5p	-0.679165	-0.961733
Vtn	NONRATT006933.2	rno-miR-200a-5p	-0.536065	-0.820975
Wipf3	NONRATT006933.2	rno-miR-200a-5p	-0.993303	-0.827176
AABR07004993.1	NONRATT006933.2	rno-miR-322-5p	-0.677744	-0.818536
AY172581.9	NONRATT006933.2	rno-miR-322-5p	-0.133732	-0.552688
Cmah	NONRATT006933.2	rno-miR-322-5p	-0.823167	-0.895923
Cndp1	NONRATT006933.2	rno-miR-322-5p	-0.649111	-0.937604
Cyp26b1	NONRATT006933.2	rno-miR-322-5p	-0.476753	-0.74362
Cyp2c11	NONRATT006933.2	rno-miR-322-5p	-0.59794	-0.652132
Dnah9	NONRATT006933.2	rno-miR-322-5p	-0.552302	-0.821916
Fst	NONRATT006933.2	rno-miR-322-5p	-0.914319	-0.673755
Gjd2	NONRATT006933.2	rno-miR-322-5p	-1.11208	-0.927733
Gng7	NONRATT006933.2	rno-miR-322-5p	-1.16584	-0.951999
Il12rb1	NONRATT006933.2	rno-miR-322-5p	-0.160261	-0.842082
Irf2bp1	NONRATT006933.2	rno-miR-322-5p	-0.893367	-0.765081
Itk	NONRATT006933.2	rno-miR-322-5p	-0.494538	-0.904536
Olr1668	NONRATT006933.2	rno-miR-322-5p	-0.578603	-0.791865
Pde4c	NONRATT006933.2	rno-miR-322-5p	-0.934172	-0.846776
Ppp1r1a	NONRATT006933.2	rno-miR-322-5p	-0.808831	-0.971352
Ppp1r1b	NONRATT006933.2	rno-miR-322-5p	-0.483949	-0.777077
Prelid2	NONRATT006933.2	rno-miR-322-5p	-1.31502	-0.886221
Rasd2	NONRATT006933.2	rno-miR-322-5p	-0.596096	-0.851457
RT1-A3	NONRATT006933.2	rno-miR-322-5p	-0.161708	0.700819
RT1-Ba	NONRATT006933.2	rno-miR-322-5p	-1.23115	-0.711058
RT1-Db1	NONRATT006933.2	rno-miR-322-5p	-0.782118	-0.775412
Shc3	NONRATT006933.2	rno-miR-322-5p	-0.146013	-0.673391
Smim5	NONRATT006933.2	rno-miR-322-5p	-0.213454	-0.927405
Snhg11	NONRATT006933.2	rno-miR-322-5p	-0.262438	-0.957957
Sv2b	NONRATT006933.2	rno-miR-322-5p	-0.253324	-0.77723
Tmem184b	NONRATT006933.2	rno-miR-322-5p	-0.905904	-0.961733
Ucp1	NONRATT006933.2	rno-miR-322-5p	-0.120439	0.675669
Vtn	NONRATT006933.2	rno-miR-322-5p	-0.427694	-0.820975
Wipf3	NONRATT006933.2	rno-miR-322-5p	-0.672998	-0.827176
AABR07004993.1	NONRATT006933.2	rno-miR-374-5p	-0.545077	-0.818536
AY172581.9	NONRATT006933.2	rno-miR-374-5p	-1.23925	-0.552688
Cmah	NONRATT006933.2	rno-miR-374-5p	-0.981913	-0.895923
Cndp1	NONRATT006933.2	rno-miR-374-5p	-0.546718	-0.937604
Cyp26b1	NONRATT006933.2	rno-miR-374-5p	-1.01201	-0.74362
Cyp2c11	NONRATT006933.2	rno-miR-374-5p	-0.96855	-0.652132
Dnah9	NONRATT006933.2	rno-miR-374-5p	-0.731985	-0.821916
Fst	NONRATT006933.2	rno-miR-374-5p	-0.843673	-0.673755
Gjd2	NONRATT006933.2	rno-miR-374-5p	-0.558092	-0.927733
Gng7	NONRATT006933.2	rno-miR-374-5p	-0.737984	-0.951999
Il12rb1	NONRATT006933.2	rno-miR-374-5p	-1.26338	-0.842082
Irf2bp1	NONRATT006933.2	rno-miR-374-5p	-0.736771	-0.765081
Itk	NONRATT006933.2	rno-miR-374-5p	-1.6587	-0.904536
Moap1	NONRATT006933.2	rno-miR-374-5p	-1.25163	-0.598729
Olr1668	NONRATT006933.2	rno-miR-374-5p	-1.14801	-0.791865
Pde4c	NONRATT006933.2	rno-miR-374-5p	-0.265704	-0.846776
Ppp1r1a	NONRATT006933.2	rno-miR-374-5p	-0.38796	-0.971352
Ppp1r1b	NONRATT006933.2	rno-miR-374-5p	-1.20929	-0.777077
Prelid2	NONRATT006933.2	rno-miR-374-5p	-0.610182	-0.886221
Rasd2	NONRATT006933.2	rno-miR-374-5p	-1.70883	-0.851457
Rcan2	NONRATT006933.2	rno-miR-374-5p	-1.06857	-0.785116
RT1-Ba	NONRATT006933.2	rno-miR-374-5p	-0.346809	-0.711058
RT1-Db1	NONRATT006933.2	rno-miR-374-5p	-0.343269	-0.775412
Shc3	NONRATT006933.2	rno-miR-374-5p	-0.923335	-0.673391
Smim5	NONRATT006933.2	rno-miR-374-5p	-1.23364	-0.927405
Snhg11	NONRATT006933.2	rno-miR-374-5p	-0.594222	-0.957957
Sv2b	NONRATT006933.2	rno-miR-374-5p	-1.2549	-0.77723
Tmem184b	NONRATT006933.2	rno-miR-374-5p	-0.457254	-0.961733
Vtn	NONRATT006933.2	rno-miR-374-5p	-1.51813	-0.820975
Wipf3	NONRATT006933.2	rno-miR-374-5p	-0.875275	-0.827176
AABR07007717.3	NONRATT008581.2	rno-miR-122-5p	-0.198813	-0.592365
Apln	NONRATT008581.2	rno-miR-122-5p	-0.211721	-0.595358
Apoa4	NONRATT008581.2	rno-miR-122-5p	-0.166995	-0.61343
Car13	NONRATT008581.2	rno-miR-122-5p	-0.238751	-0.559969
Cldn22	NONRATT008581.2	rno-miR-122-5p	-0.222216	-0.586079
Cstb	NONRATT008581.2	rno-miR-122-5p	-0.231939	-0.522116
Cyp2f4	NONRATT008581.2	rno-miR-122-5p	-0.258295	-0.476695
Dkkl1	NONRATT008581.2	rno-miR-122-5p	-0.260725	-0.506467
Gas2l3	NONRATT008581.2	rno-miR-122-5p	-0.141884	-0.644708
Gpnmb	NONRATT008581.2	rno-miR-122-5p	-0.246282	-0.517716
Gpt2	NONRATT008581.2	rno-miR-122-5p	-0.330677	-0.512114
Gstm1	NONRATT008581.2	rno-miR-122-5p	-0.188336	-0.618701
Hcar2	NONRATT008581.2	rno-miR-122-5p	-0.149618	-0.661698
Lingo4	NONRATT008581.2	rno-miR-122-5p	-0.229971	-0.490618
Lox	NONRATT008581.2	rno-miR-122-5p	-0.224895	-0.579758
Lrrcc1	NONRATT008581.2	rno-miR-122-5p	-0.110979	-0.613278
Mfsd2a	NONRATT008581.2	rno-miR-122-5p	-0.278047	-0.545163
Plin1	NONRATT008581.2	rno-miR-122-5p	-0.651804	-0.430531
RT1-A3	NONRATT008581.2	rno-miR-122-5p	-0.301132	-0.514501
Slc5a8	NONRATT008581.2	rno-miR-122-5p	-0.37627	-0.505799
Steap1	NONRATT008581.2	rno-miR-122-5p	-0.251011	-0.539733
Ucp1	NONRATT008581.2	rno-miR-122-5p	-0.684543	-0.389925
AABR07007717.3	NONRATT008581.2	rno-miR-126a-5p	-1.21053	-0.592365
Ak1	NONRATT008581.2	rno-miR-126a-5p	-0.251389	-0.787276
Apln	NONRATT008581.2	rno-miR-126a-5p	-1.1516	-0.595358
Apoa4	NONRATT008581.2	rno-miR-126a-5p	-0.986333	-0.61343
Arntl	NONRATT008581.2	rno-miR-126a-5p	-0.201203	-0.770847
Car13	NONRATT008581.2	rno-miR-126a-5p	-0.942567	-0.559969
Cldn22	NONRATT008581.2	rno-miR-126a-5p	-1.15212	-0.586079
Cplx1	NONRATT008581.2	rno-miR-126a-5p	-0.487924	-0.723373
Cstb	NONRATT008581.2	rno-miR-126a-5p	-1.40123	-0.522116
Cyp2f4	NONRATT008581.2	rno-miR-126a-5p	-1.20592	-0.476695
Dkkl1	NONRATT008581.2	rno-miR-126a-5p	-1.23855	-0.506467
Ephx1	NONRATT008581.2	rno-miR-126a-5p	-0.397068	-0.757041
Gas2l3	NONRATT008581.2	rno-miR-126a-5p	-0.73974	-0.644708
Gpnmb	NONRATT008581.2	rno-miR-126a-5p	-1.3242	-0.517716
Gpt2	NONRATT008581.2	rno-miR-126a-5p	-1.03043	-0.512114
Gstm1	NONRATT008581.2	rno-miR-126a-5p	-1.44742	-0.618701
Hcar2	NONRATT008581.2	rno-miR-126a-5p	-1.08711	-0.661698
Lingo4	NONRATT008581.2	rno-miR-126a-5p	-1.14457	-0.490618
LOC100360679	NONRATT008581.2	rno-miR-126a-5p	-0.414047	-0.756041
Lox	NONRATT008581.2	rno-miR-126a-5p	-1.03874	-0.579758
Lrrcc1	NONRATT008581.2	rno-miR-126a-5p	-0.554818	-0.613278
Mat1a	NONRATT008581.2	rno-miR-126a-5p	-0.502371	-0.728712
Mfsd2a	NONRATT008581.2	rno-miR-126a-5p	-0.980084	-0.545163
Plin1	NONRATT008581.2	rno-miR-126a-5p	-0.428905	-0.430531
RT1-A3	NONRATT008581.2	rno-miR-126a-5p	-0.264956	-0.514501
Slc16a1	NONRATT008581.2	rno-miR-126a-5p	-0.385041	-0.716783
Slc5a8	NONRATT008581.2	rno-miR-126a-5p	-0.75914	-0.505799
Steap1	NONRATT008581.2	rno-miR-126a-5p	-1.35284	-0.539733
Ucp1	NONRATT008581.2	rno-miR-126a-5p	-0.380816	-0.389925
AABR07007717.3	NONRATT008581.2	rno-miR-200a-5p	-1.19644	-0.592365
Ak1	NONRATT008581.2	rno-miR-200a-5p	-0.351174	-0.787276
Apln	NONRATT008581.2	rno-miR-200a-5p	-1.2566	-0.595358
Apoa4	NONRATT008581.2	rno-miR-200a-5p	-1.34744	-0.61343
Arntl	NONRATT008581.2	rno-miR-200a-5p	-0.662817	-0.770847
Car13	NONRATT008581.2	rno-miR-200a-5p	-1.2226	-0.559969
Cldn22	NONRATT008581.2	rno-miR-200a-5p	-1.30535	-0.586079
Cplx1	NONRATT008581.2	rno-miR-200a-5p	-0.752647	-0.723373
Cstb	NONRATT008581.2	rno-miR-200a-5p	-1.30511	-0.522116
Cyp2f4	NONRATT008581.2	rno-miR-200a-5p	-1.1564	-0.476695
Dkkl1	NONRATT008581.2	rno-miR-200a-5p	-1.20907	-0.506467
Ephx1	NONRATT008581.2	rno-miR-200a-5p	-0.681216	-0.757041
Gas2l3	NONRATT008581.2	rno-miR-200a-5p	-0.946616	-0.644708
Gpnmb	NONRATT008581.2	rno-miR-200a-5p	-1.25976	-0.517716
Gpt2	NONRATT008581.2	rno-miR-200a-5p	-1.18709	-0.512114
Gstm1	NONRATT008581.2	rno-miR-200a-5p	-1.41145	-0.618701
Hcar2	NONRATT008581.2	rno-miR-200a-5p	-1.36465	-0.661698
Lingo4	NONRATT008581.2	rno-miR-200a-5p	-1.09395	-0.490618
LOC100360679	NONRATT008581.2	rno-miR-200a-5p	-0.791243	-0.756041
Lox	NONRATT008581.2	rno-miR-200a-5p	-1.38763	-0.579758
Lrrcc1	NONRATT008581.2	rno-miR-200a-5p	-0.662239	-0.613278
Mat1a	NONRATT008581.2	rno-miR-200a-5p	-0.807557	-0.728712
Mfsd2a	NONRATT008581.2	rno-miR-200a-5p	-1.17864	-0.545163
Plin1	NONRATT008581.2	rno-miR-200a-5p	-0.588259	-0.430531
RT1-A3	NONRATT008581.2	rno-miR-200a-5p	-0.403383	-0.514501
Slc16a1	NONRATT008581.2	rno-miR-200a-5p	-0.568921	-0.716783
Slc5a8	NONRATT008581.2	rno-miR-200a-5p	-0.967368	-0.505799
Steap1	NONRATT008581.2	rno-miR-200a-5p	-1.33176	-0.539733
Ucp1	NONRATT008581.2	rno-miR-200a-5p	-0.529005	-0.389925
AABR07007717.3	NONRATT008581.2	rno-miR-322-5p	-0.84802	-0.592365
Ak1	NONRATT008581.2	rno-miR-322-5p	-0.274096	-0.787276
Apln	NONRATT008581.2	rno-miR-322-5p	-0.845296	-0.595358
Apoa4	NONRATT008581.2	rno-miR-322-5p	-0.950718	-0.61343
Arntl	NONRATT008581.2	rno-miR-322-5p	-0.34325	-0.770847
Car13	NONRATT008581.2	rno-miR-322-5p	-0.913937	-0.559969
Cldn22	NONRATT008581.2	rno-miR-322-5p	-0.887109	-0.586079
Cplx1	NONRATT008581.2	rno-miR-322-5p	-0.511759	-0.723373
Cstb	NONRATT008581.2	rno-miR-322-5p	-1.04602	-0.522116
Cyp2f4	NONRATT008581.2	rno-miR-322-5p	-0.887772	-0.476695
Dkkl1	NONRATT008581.2	rno-miR-322-5p	-0.904761	-0.506467
Ephx1	NONRATT008581.2	rno-miR-322-5p	-0.396992	-0.757041
Gas2l3	NONRATT008581.2	rno-miR-322-5p	-0.881434	-0.644708
Gpnmb	NONRATT008581.2	rno-miR-322-5p	-0.963773	-0.517716
Gpt2	NONRATT008581.2	rno-miR-322-5p	-0.871694	-0.512114
Gstm1	NONRATT008581.2	rno-miR-322-5p	-0.952774	-0.618701
Hcar2	NONRATT008581.2	rno-miR-322-5p	-0.849941	-0.661698
Lingo4	NONRATT008581.2	rno-miR-322-5p	-0.836232	-0.490618
LOC100360679	NONRATT008581.2	rno-miR-322-5p	-0.335097	-0.756041
Lox	NONRATT008581.2	rno-miR-322-5p	-1.12721	-0.579758
Lrrcc1	NONRATT008581.2	rno-miR-322-5p	-0.615072	-0.613278
Mat1a	NONRATT008581.2	rno-miR-322-5p	-0.504629	-0.728712
Mfsd2a	NONRATT008581.2	rno-miR-322-5p	-0.840472	-0.545163
Plin1	NONRATT008581.2	rno-miR-322-5p	-0.474215	-0.430531
RT1-A3	NONRATT008581.2	rno-miR-322-5p	-0.352858	-0.514501
Slc16a1	NONRATT008581.2	rno-miR-322-5p	-0.436971	-0.716783
Slc5a8	NONRATT008581.2	rno-miR-322-5p	-0.734959	-0.505799
Steap1	NONRATT008581.2	rno-miR-322-5p	-0.986864	-0.539733
Ucp1	NONRATT008581.2	rno-miR-322-5p	-0.425601	-0.389925
AABR07007717.3	NONRATT008581.2	rno-miR-374-5p	-0.651991	-0.592365
Ak1	NONRATT008581.2	rno-miR-374-5p	-0.292357	-0.787276
Apln	NONRATT008581.2	rno-miR-374-5p	-0.615444	-0.595358
Apoa4	NONRATT008581.2	rno-miR-374-5p	-0.673148	-0.61343
Arntl	NONRATT008581.2	rno-miR-374-5p	-0.329844	-0.770847
Car13	NONRATT008581.2	rno-miR-374-5p	-0.670603	-0.559969
Cldn22	NONRATT008581.2	rno-miR-374-5p	-0.610635	-0.586079
Cplx1	NONRATT008581.2	rno-miR-374-5p	-0.494059	-0.723373
Cstb	NONRATT008581.2	rno-miR-374-5p	-0.698667	-0.522116
Cyp2f4	NONRATT008581.2	rno-miR-374-5p	-0.647913	-0.476695
Dkkl1	NONRATT008581.2	rno-miR-374-5p	-0.643693	-0.506467
Ephx1	NONRATT008581.2	rno-miR-374-5p	-0.369708	-0.757041
Gas2l3	NONRATT008581.2	rno-miR-374-5p	-0.634499	-0.644708
Gpnmb	NONRATT008581.2	rno-miR-374-5p	-0.691454	-0.517716
Gpt2	NONRATT008581.2	rno-miR-374-5p	-0.671224	-0.512114
Gstm1	NONRATT008581.2	rno-miR-374-5p	-0.636066	-0.618701
Hcar2	NONRATT008581.2	rno-miR-374-5p	-0.658043	-0.661698
Lingo4	NONRATT008581.2	rno-miR-374-5p	-0.613723	-0.490618
LOC100360679	NONRATT008581.2	rno-miR-374-5p	-0.342396	-0.756041
Lox	NONRATT008581.2	rno-miR-374-5p	-0.74891	-0.579758
Lrrcc1	NONRATT008581.2	rno-miR-374-5p	-0.884445	-0.613278
Mat1a	NONRATT008581.2	rno-miR-374-5p	-0.47191	-0.728712
Mfsd2a	NONRATT008581.2	rno-miR-374-5p	-0.612393	-0.545163
Plin1	NONRATT008581.2	rno-miR-374-5p	-0.414981	-0.430531
RT1-A3	NONRATT008581.2	rno-miR-374-5p	-0.389692	-0.514501
Slc16a1	NONRATT008581.2	rno-miR-374-5p	-0.4162	-0.716783
Slc5a8	NONRATT008581.2	rno-miR-374-5p	-0.606786	-0.505799
Steap1	NONRATT008581.2	rno-miR-374-5p	-0.667462	-0.539733
Ucp1	NONRATT008581.2	rno-miR-374-5p	-0.365645	-0.389925
AABR07007717.3	NONRATT010176.2	rno-miR-122-5p	-0.185882	0.102538
Ak1	NONRATT010176.2	rno-miR-122-5p	-0.358693	0.600573
Apln	NONRATT010176.2	rno-miR-122-5p	-0.205986	0.0215906
Apoa4	NONRATT010176.2	rno-miR-122-5p	-0.398832	0.091313
Arntl	NONRATT010176.2	rno-miR-122-5p	-0.232975	0.246074
Car13	NONRATT010176.2	rno-miR-122-5p	-0.36731	0.00261542
Cldn22	NONRATT010176.2	rno-miR-122-5p	-0.208533	-0.00684397
Cplx1	NONRATT010176.2	rno-miR-122-5p	-0.560357	0.358205
Cstb	NONRATT010176.2	rno-miR-122-5p	-0.154979	0.0691274
Cyp2f4	NONRATT010176.2	rno-miR-122-5p	-0.112724	-0.0398996
Dkkl1	NONRATT010176.2	rno-miR-122-5p	-0.128044	-0.0365802
Ephx1	NONRATT010176.2	rno-miR-122-5p	-0.24723	0.292314
Gas2l3	NONRATT010176.2	rno-miR-122-5p	-0.210645	0.436427
Gpnmb	NONRATT010176.2	rno-miR-122-5p	-0.15009	0.0253167
Gpt2	NONRATT010176.2	rno-miR-122-5p	-0.17174	-0.0806454
Gstm1	NONRATT010176.2	rno-miR-122-5p	-0.228868	0.110866
Hcar2	NONRATT010176.2	rno-miR-122-5p	-0.318595	0.197826
Lingo4	NONRATT010176.2	rno-miR-122-5p	-0.108662	-0.0164276
LOC100360679	NONRATT010176.2	rno-miR-122-5p	-0.458087	0.352777
Lox	NONRATT010176.2	rno-miR-122-5p	-0.401666	0.112394
Lrrcc1	NONRATT010176.2	rno-miR-122-5p	-0.158553	0.673072
Mat1a	NONRATT010176.2	rno-miR-122-5p	-0.533942	0.320808
Mfsd2a	NONRATT010176.2	rno-miR-122-5p	-0.183034	-0.0818516
Plin1	NONRATT010176.2	rno-miR-122-5p	-0.183434	-0.113322
RT1-A3	NONRATT010176.2	rno-miR-122-5p	-0.394816	0.220743
Slc16a1	NONRATT010176.2	rno-miR-122-5p	-0.636786	0.326096
Slc5a8	NONRATT010176.2	rno-miR-122-5p	-0.288386	-0.0941563
Steap1	NONRATT010176.2	rno-miR-122-5p	-0.166831	0.00655667
Gas2l3	NONRATT010176.2	rno-miR-126a-5p	-0.158045	0.436427
LOC100360679	NONRATT010176.2	rno-miR-126a-5p	-0.11198	0.352777
Lrrcc1	NONRATT010176.2	rno-miR-126a-5p	-0.183059	0.673072
Cndp1	NONRATT010176.2	rno-miR-200a-5p	-0.130625	-0.320208
Lrrcc1	NONRATT010176.2	rno-miR-200a-5p	-0.125395	0.673072
Pde4c	NONRATT010176.2	rno-miR-200a-5p	-0.107977	-0.385227
Tmem184b	NONRATT010176.2	rno-miR-200a-5p	-0.215755	-0.291557
Cndp1	NONRATT010176.2	rno-miR-322-5p	-0.277462	-0.320208
Cyp26b1	NONRATT010176.2	rno-miR-322-5p	-0.116094	-0.463683
Dnah9	NONRATT010176.2	rno-miR-322-5p	-0.132344	-0.430938
Lrrcc1	NONRATT010176.2	rno-miR-322-5p	-0.13858	0.673072
Moap1	NONRATT010176.2	rno-miR-322-5p	-0.105193	-0.44624
Pde4c	NONRATT010176.2	rno-miR-322-5p	-0.170177	-0.385227
Shc3	NONRATT010176.2	rno-miR-322-5p	-0.132154	-0.402457
Tmem184b	NONRATT010176.2	rno-miR-322-5p	-0.417049	-0.291557
AABR07004993.1	NONRATT010176.2	rno-miR-374-5p	-0.190867	-0.63196
AY172581.9	NONRATT010176.2	rno-miR-374-5p	-0.295248	-0.454007
Cndp1	NONRATT010176.2	rno-miR-374-5p	-0.811562	-0.320208
Cyp26b1	NONRATT010176.2	rno-miR-374-5p	-0.358476	-0.463683
Cyp2c11	NONRATT010176.2	rno-miR-374-5p	-0.249241	-0.542985
Dnah9	NONRATT010176.2	rno-miR-374-5p	-0.414827	-0.430938
Fst	NONRATT010176.2	rno-miR-374-5p	-0.231839	-0.565178
Gjd2	NONRATT010176.2	rno-miR-374-5p	-0.281385	-0.557059
Gng7	NONRATT010176.2	rno-miR-374-5p	-0.392793	-0.515195
Il12rb1	NONRATT010176.2	rno-miR-374-5p	-0.411608	-0.490731
Irf2bp1	NONRATT010176.2	rno-miR-374-5p	-0.324645	-0.480892
Itk	NONRATT010176.2	rno-miR-374-5p	-0.347643	-0.524573
Moap1	NONRATT010176.2	rno-miR-374-5p	-0.322425	-0.44624
Pde4c	NONRATT010176.2	rno-miR-374-5p	-0.397669	-0.385227
Ppp1r1a	NONRATT010176.2	rno-miR-374-5p	-0.52895	-0.47574
Ppp1r1b	NONRATT010176.2	rno-miR-374-5p	-0.17376	-0.636424
Prelid2	NONRATT010176.2	rno-miR-374-5p	-0.367438	-0.498858
Rcan2	NONRATT010176.2	rno-miR-374-5p	-0.163573	-0.648037
RT1-Ba	NONRATT010176.2	rno-miR-374-5p	-0.241386	-0.503635
RT1-Db1	NONRATT010176.2	rno-miR-374-5p	-0.250326	-0.532806
Shc3	NONRATT010176.2	rno-miR-374-5p	-0.356243	-0.402457
Smim5	NONRATT010176.2	rno-miR-374-5p	-0.454299	-0.502399
Snhg11	NONRATT010176.2	rno-miR-374-5p	-0.556371	-0.470838
Sv2b	NONRATT010176.2	rno-miR-374-5p	-0.254632	-0.575321
Tmem184b	NONRATT010176.2	rno-miR-374-5p	-1.06492	-0.291557
Vtn	NONRATT010176.2	rno-miR-374-5p	-0.25927	-0.567588
Wipf3	NONRATT010176.2	rno-miR-374-5p	-0.348316	-0.503581
AABR07007717.3	NONRATT010946.2	rno-miR-122-5p	-0.163516	-0.620551
Ak1	NONRATT010946.2	rno-miR-122-5p	-0.135086	-0.664299
Apln	NONRATT010946.2	rno-miR-122-5p	-0.170342	-0.611879
Cldn22	NONRATT010946.2	rno-miR-122-5p	-0.145808	-0.627604
Cstb	NONRATT010946.2	rno-miR-122-5p	-0.139161	-0.657199
Cyp2f4	NONRATT010946.2	rno-miR-122-5p	-0.207013	-0.536383
Dkkl1	NONRATT010946.2	rno-miR-122-5p	-0.202718	-0.563349
Ephx1	NONRATT010946.2	rno-miR-122-5p	-0.119965	-0.691292
Gpnmb	NONRATT010946.2	rno-miR-122-5p	-0.178649	-0.595901
Gpt2	NONRATT010946.2	rno-miR-122-5p	-0.273923	-0.5219
Gstm1	NONRATT010946.2	rno-miR-122-5p	-0.109115	-0.693221
Lingo4	NONRATT010946.2	rno-miR-122-5p	-0.189058	-0.544417
Mfsd2a	NONRATT010946.2	rno-miR-122-5p	-0.2003	-0.563598
Plin1	NONRATT010946.2	rno-miR-122-5p	-0.65058	-0.406611
RT1-A3	NONRATT010946.2	rno-miR-122-5p	-0.295572	-0.491345
Slc5a8	NONRATT010946.2	rno-miR-122-5p	-0.307618	-0.497961
Steap1	NONRATT010946.2	rno-miR-122-5p	-0.164422	-0.622545
Ucp1	NONRATT010946.2	rno-miR-122-5p	-0.700583	-0.357787
AABR07007717.3	NONRATT010946.2	rno-miR-126a-5p	-1.54013	-0.620551
Ak1	NONRATT010946.2	rno-miR-126a-5p	-0.487321	-0.664299
Apln	NONRATT010946.2	rno-miR-126a-5p	-1.52228	-0.611879
Apoa4	NONRATT010946.2	rno-miR-126a-5p	-1.05076	-0.684466
Arntl	NONRATT010946.2	rno-miR-126a-5p	-0.930673	-0.757777
Car13	NONRATT010946.2	rno-miR-126a-5p	-1.02554	-0.626587
Cldn22	NONRATT010946.2	rno-miR-126a-5p	-1.38469	-0.627604
Cplx1	NONRATT010946.2	rno-miR-126a-5p	-0.643444	-0.740571
Cstb	NONRATT010946.2	rno-miR-126a-5p	-1.21554	-0.657199
Cyp2f4	NONRATT010946.2	rno-miR-126a-5p	-1.35336	-0.536383
Dkkl1	NONRATT010946.2	rno-miR-126a-5p	-1.40171	-0.563349
Ephx1	NONRATT010946.2	rno-miR-126a-5p	-1.1889	-0.691292
Gas2l3	NONRATT010946.2	rno-miR-126a-5p	-0.147262	-0.900356
Gpnmb	NONRATT010946.2	rno-miR-126a-5p	-1.40956	-0.595901
Gpt2	NONRATT010946.2	rno-miR-126a-5p	-1.29855	-0.5219
Gstm1	NONRATT010946.2	rno-miR-126a-5p	-1.51168	-0.693221
Hcar2	NONRATT010946.2	rno-miR-126a-5p	-1.46577	-0.696103
Lingo4	NONRATT010946.2	rno-miR-126a-5p	-1.30113	-0.544417
LOC100360679	NONRATT010946.2	rno-miR-126a-5p	-0.54577	-0.796777
Lox	NONRATT010946.2	rno-miR-126a-5p	-0.862035	-0.713206
Lrrcc1	NONRATT010946.2	rno-miR-126a-5p	-0.493208	-0.72564
Mat1a	NONRATT010946.2	rno-miR-126a-5p	-0.749389	-0.730767
Mfsd2a	NONRATT010946.2	rno-miR-126a-5p	-1.2209	-0.563598
Plin1	NONRATT010946.2	rno-miR-126a-5p	-0.530379	-0.406611
RT1-A3	NONRATT010946.2	rno-miR-126a-5p	-0.316778	-0.491345
Slc16a1	NONRATT010946.2	rno-miR-126a-5p	-0.430011	-0.750549
Slc5a8	NONRATT010946.2	rno-miR-126a-5p	-0.963993	-0.497961
Steap1	NONRATT010946.2	rno-miR-126a-5p	-1.40958	-0.622545
Ucp1	NONRATT010946.2	rno-miR-126a-5p	-0.474705	-0.357787
AABR07007717.3	NONRATT010946.2	rno-miR-200a-5p	-1.36139	-0.620551
Ak1	NONRATT010946.2	rno-miR-200a-5p	-0.653772	-0.664299
Apln	NONRATT010946.2	rno-miR-200a-5p	-1.48553	-0.611879
Apoa4	NONRATT010946.2	rno-miR-200a-5p	-1.32507	-0.684466
Arntl	NONRATT010946.2	rno-miR-200a-5p	-1.12554	-0.757777
Car13	NONRATT010946.2	rno-miR-200a-5p	-1.2456	-0.626587
Cldn22	NONRATT010946.2	rno-miR-200a-5p	-1.43157	-0.627604
Cplx1	NONRATT010946.2	rno-miR-200a-5p	-0.908692	-0.740571
Cstb	NONRATT010946.2	rno-miR-200a-5p	-1.10218	-0.657199
Cyp2f4	NONRATT010946.2	rno-miR-200a-5p	-1.2157	-0.536383
Dkkl1	NONRATT010946.2	rno-miR-200a-5p	-1.27614	-0.563349
Ephx1	NONRATT010946.2	rno-miR-200a-5p	-1.30632	-0.691292
Gas2l3	NONRATT010946.2	rno-miR-200a-5p	-0.24475	-0.900356
Gpnmb	NONRATT010946.2	rno-miR-200a-5p	-1.2585	-0.595901
Gpt2	NONRATT010946.2	rno-miR-200a-5p	-1.39402	-0.5219
Gstm1	NONRATT010946.2	rno-miR-200a-5p	-1.36244	-0.693221
Hcar2	NONRATT010946.2	rno-miR-200a-5p	-1.55696	-0.696103
Lingo4	NONRATT010946.2	rno-miR-200a-5p	-1.16116	-0.544417
LOC100360679	NONRATT010946.2	rno-miR-200a-5p	-0.874728	-0.796777
Lox	NONRATT010946.2	rno-miR-200a-5p	-1.09284	-0.713206
Lrrcc1	NONRATT010946.2	rno-miR-200a-5p	-0.553181	-0.72564
Mat1a	NONRATT010946.2	rno-miR-200a-5p	-1.07881	-0.730767
Mfsd2a	NONRATT010946.2	rno-miR-200a-5p	-1.3641	-0.563598
Plin1	NONRATT010946.2	rno-miR-200a-5p	-0.704878	-0.406611
RT1-A3	NONRATT010946.2	rno-miR-200a-5p	-0.477053	-0.491345
Slc16a1	NONRATT010946.2	rno-miR-200a-5p	-0.607323	-0.750549
Slc5a8	NONRATT010946.2	rno-miR-200a-5p	-1.16354	-0.497961
Steap1	NONRATT010946.2	rno-miR-200a-5p	-1.30348	-0.622545
Ucp1	NONRATT010946.2	rno-miR-200a-5p	-0.640204	-0.357787
AABR07007717.3	NONRATT010946.2	rno-miR-322-5p	-1.39107	-0.620551
Ak1	NONRATT010946.2	rno-miR-322-5p	-0.698486	-0.664299
Apln	NONRATT010946.2	rno-miR-322-5p	-1.43681	-0.611879
Apoa4	NONRATT010946.2	rno-miR-322-5p	-1.44549	-0.684466
Arntl	NONRATT010946.2	rno-miR-322-5p	-1.03718	-0.757777
Car13	NONRATT010946.2	rno-miR-322-5p	-1.32703	-0.626587
Cldn22	NONRATT010946.2	rno-miR-322-5p	-1.40672	-0.627604
Cplx1	NONRATT010946.2	rno-miR-322-5p	-1.05807	-0.740571
Cstb	NONRATT010946.2	rno-miR-322-5p	-1.25458	-0.657199
Cyp2f4	NONRATT010946.2	rno-miR-322-5p	-1.26066	-0.536383
Dkkl1	NONRATT010946.2	rno-miR-322-5p	-1.30885	-0.563349
Ephx1	NONRATT010946.2	rno-miR-322-5p	-1.21421	-0.691292
Gas2l3	NONRATT010946.2	rno-miR-322-5p	-0.279782	-0.900356
Gpnmb	NONRATT010946.2	rno-miR-322-5p	-1.34218	-0.595901
Gpt2	NONRATT010946.2	rno-miR-322-5p	-1.39483	-0.5219
Gstm1	NONRATT010946.2	rno-miR-322-5p	-1.44161	-0.693221
Hcar2	NONRATT010946.2	rno-miR-322-5p	-1.63514	-0.696103
Lingo4	NONRATT010946.2	rno-miR-322-5p	-1.19651	-0.544417
LOC100360679	NONRATT010946.2	rno-miR-322-5p	-1.1031	-0.796777
Lox	NONRATT010946.2	rno-miR-322-5p	-1.35211	-0.713206
Lrrcc1	NONRATT010946.2	rno-miR-322-5p	-0.719063	-0.72564
Mat1a	NONRATT010946.2	rno-miR-322-5p	-1.20673	-0.730767
Mfsd2a	NONRATT010946.2	rno-miR-322-5p	-1.34187	-0.563598
Plin1	NONRATT010946.2	rno-miR-322-5p	-0.715851	-0.406611
RT1-A3	NONRATT010946.2	rno-miR-322-5p	-0.509316	-0.491345
Slc16a1	NONRATT010946.2	rno-miR-322-5p	-0.674741	-0.750549
Slc5a8	NONRATT010946.2	rno-miR-322-5p	-1.17766	-0.497961
Steap1	NONRATT010946.2	rno-miR-322-5p	-1.37314	-0.622545
Ucp1	NONRATT010946.2	rno-miR-322-5p	-0.643095	-0.357787
AABR07007717.3	NONRATT010946.2	rno-miR-374-5p	-0.731834	-0.620551
Ak1	NONRATT010946.2	rno-miR-374-5p	-0.76574	-0.664299
Apln	NONRATT010946.2	rno-miR-374-5p	-0.710177	-0.611879
Apoa4	NONRATT010946.2	rno-miR-374-5p	-0.658565	-0.684466
Arntl	NONRATT010946.2	rno-miR-374-5p	-0.476037	-0.757777
Car13	NONRATT010946.2	rno-miR-374-5p	-0.67597	-0.626587
Cldn22	NONRATT010946.2	rno-miR-374-5p	-0.655773	-0.627604
Cplx1	NONRATT010946.2	rno-miR-374-5p	-0.665866	-0.740571
Cstb	NONRATT010946.2	rno-miR-374-5p	-0.587888	-0.657199
Cyp2f4	NONRATT010946.2	rno-miR-374-5p	-0.670951	-0.536383
Dkkl1	NONRATT010946.2	rno-miR-374-5p	-0.668608	-0.563349
Ephx1	NONRATT010946.2	rno-miR-374-5p	-0.717236	-0.691292
Gas2l3	NONRATT010946.2	rno-miR-374-5p	-0.118149	-0.900356
Gpnmb	NONRATT010946.2	rno-miR-374-5p	-0.683073	-0.595901
Gpt2	NONRATT010946.2	rno-miR-374-5p	-0.77621	-0.5219
Gstm1	NONRATT010946.2	rno-miR-374-5p	-0.612487	-0.693221
Hcar2	NONRATT010946.2	rno-miR-374-5p	-0.745638	-0.696103
Lingo4	NONRATT010946.2	rno-miR-374-5p	-0.640938	-0.544417
LOC100360679	NONRATT010946.2	rno-miR-374-5p	-0.396985	-0.796777
Lox	NONRATT010946.2	rno-miR-374-5p	-0.590267	-0.713206
Lrrcc1	NONRATT010946.2	rno-miR-374-5p	-0.694978	-0.72564
Mat1a	NONRATT010946.2	rno-miR-374-5p	-0.714931	-0.730767
Mfsd2a	NONRATT010946.2	rno-miR-374-5p	-0.694028	-0.563598
Plin1	NONRATT010946.2	rno-miR-374-5p	-0.492098	-0.406611
RT1-A3	NONRATT010946.2	rno-miR-374-5p	-0.464065	-0.491345
Slc16a1	NONRATT010946.2	rno-miR-374-5p	-0.453586	-0.750549
Slc5a8	NONRATT010946.2	rno-miR-374-5p	-0.721296	-0.497961
Steap1	NONRATT010946.2	rno-miR-374-5p	-0.646474	-0.622545
Ucp1	NONRATT010946.2	rno-miR-374-5p	-0.437308	-0.357787
AABR07007717.3	NONRATT011166.2	rno-miR-122-5p	-0.284082	0.432982
Ak1	NONRATT011166.2	rno-miR-122-5p	-0.29976	0.568838
Apln	NONRATT011166.2	rno-miR-122-5p	-0.356265	0.31617
Apoa4	NONRATT011166.2	rno-miR-122-5p	-0.552311	0.282724
Arntl	NONRATT011166.2	rno-miR-122-5p	-0.300672	0.529234
Car13	NONRATT011166.2	rno-miR-122-5p	-0.571836	0.177797
Cldn22	NONRATT011166.2	rno-miR-122-5p	-0.379428	0.269837
Cplx1	NONRATT011166.2	rno-miR-122-5p	-0.554335	0.43577
Cstb	NONRATT011166.2	rno-miR-122-5p	-0.242063	0.41209
Cyp2f4	NONRATT011166.2	rno-miR-122-5p	-0.212151	0.333523
Dkkl1	NONRATT011166.2	rno-miR-122-5p	-0.245791	0.315876
Ephx1	NONRATT011166.2	rno-miR-122-5p	-0.308219	0.564473
Gas2l3	NONRATT011166.2	rno-miR-122-5p	-0.222564	0.631514
Gpnmb	NONRATT011166.2	rno-miR-122-5p	-0.25452	0.372061
Gpt2	NONRATT011166.2	rno-miR-122-5p	-0.390592	0.164408
Gstm1	NONRATT011166.2	rno-miR-122-5p	-0.342287	0.405209
Hcar2	NONRATT011166.2	rno-miR-122-5p	-0.422782	0.443168
Lingo4	NONRATT011166.2	rno-miR-122-5p	-0.191195	0.37233
LOC100360679	NONRATT011166.2	rno-miR-122-5p	-0.494015	0.4922
Lox	NONRATT011166.2	rno-miR-122-5p	-0.520557	0.286162
Lrrcc1	NONRATT011166.2	rno-miR-122-5p	-0.149137	0.811921
Mat1a	NONRATT011166.2	rno-miR-122-5p	-0.563246	0.434745
Mfsd2a	NONRATT011166.2	rno-miR-122-5p	-0.420502	0.150376
RT1-A3	NONRATT011166.2	rno-miR-122-5p	-0.145794	0.00881728
Slc16a1	NONRATT011166.2	rno-miR-122-5p	-0.502758	0.287703
Slc5a8	NONRATT011166.2	rno-miR-122-5p	-0.577924	0.0309856
Steap1	NONRATT011166.2	rno-miR-122-5p	-0.295056	0.328216
AABR07004993.1	NONRATT011166.2	rno-miR-126a-5p	-0.21957	-0.569097
AY172581.9	NONRATT011166.2	rno-miR-126a-5p	-0.164529	-0.533449
Cndp1	NONRATT011166.2	rno-miR-126a-5p	-0.422154	-0.491987
Cyp26b1	NONRATT011166.2	rno-miR-126a-5p	-0.249413	-0.53819
Cyp2c11	NONRATT011166.2	rno-miR-126a-5p	-0.188425	-0.599964
Dnah9	NONRATT011166.2	rno-miR-126a-5p	-0.241874	-0.54365
Fst	NONRATT011166.2	rno-miR-126a-5p	-0.160708	-0.659349
Gjd2	NONRATT011166.2	rno-miR-126a-5p	-0.100386	-0.657548
Il12rb1	NONRATT011166.2	rno-miR-126a-5p	-0.260462	-0.532073
Irf2bp1	NONRATT011166.2	rno-miR-126a-5p	-0.234102	-0.578117
Itk	NONRATT011166.2	rno-miR-126a-5p	-0.113887	-0.675371
Moap1	NONRATT011166.2	rno-miR-126a-5p	-0.169046	-0.506186
Pde4c	NONRATT011166.2	rno-miR-126a-5p	-0.335213	-0.457816
Ppp1r1a	NONRATT011166.2	rno-miR-126a-5p	-0.120348	-0.617156
Ppp1r1b	NONRATT011166.2	rno-miR-126a-5p	-0.129251	-0.704929
Prelid2	NONRATT011166.2	rno-miR-126a-5p	-0.100223	-0.646123
Rcan2	NONRATT011166.2	rno-miR-126a-5p	-0.209562	-0.523617
RT1-Ba	NONRATT011166.2	rno-miR-126a-5p	-0.220034	-0.568665
RT1-Db1	NONRATT011166.2	rno-miR-126a-5p	-0.269501	-0.474825
Shc3	NONRATT011166.2	rno-miR-126a-5p	-0.201578	-0.455468
Smim5	NONRATT011166.2	rno-miR-126a-5p	-0.241456	-0.576952
Snhg11	NONRATT011166.2	rno-miR-126a-5p	-0.275026	-0.55205
Sv2b	NONRATT011166.2	rno-miR-126a-5p	-0.17322	-0.619797
Tmem184b	NONRATT011166.2	rno-miR-126a-5p	-0.194492	-0.541995
Vtn	NONRATT011166.2	rno-miR-126a-5p	-0.153706	-0.666546
Wipf3	NONRATT011166.2	rno-miR-126a-5p	-0.238129	-0.577835
AABR07004993.1	NONRATT011166.2	rno-miR-200a-5p	-0.224079	-0.569097
AY172581.9	NONRATT011166.2	rno-miR-200a-5p	-0.160597	-0.533449
Cndp1	NONRATT011166.2	rno-miR-200a-5p	-0.402581	-0.491987
Cyp26b1	NONRATT011166.2	rno-miR-200a-5p	-0.250738	-0.53819
Cyp2c11	NONRATT011166.2	rno-miR-200a-5p	-0.190254	-0.599964
Dnah9	NONRATT011166.2	rno-miR-200a-5p	-0.225886	-0.54365
Fst	NONRATT011166.2	rno-miR-200a-5p	-0.150679	-0.659349
Il12rb1	NONRATT011166.2	rno-miR-200a-5p	-0.257432	-0.532073
Irf2bp1	NONRATT011166.2	rno-miR-200a-5p	-0.223985	-0.578117
Itk	NONRATT011166.2	rno-miR-200a-5p	-0.101158	-0.675371
Moap1	NONRATT011166.2	rno-miR-200a-5p	-0.159777	-0.506186
Pde4c	NONRATT011166.2	rno-miR-200a-5p	-0.332418	-0.457816
Ppp1r1b	NONRATT011166.2	rno-miR-200a-5p	-0.122143	-0.704929
Rcan2	NONRATT011166.2	rno-miR-200a-5p	-0.22458	-0.523617
RT1-Ba	NONRATT011166.2	rno-miR-200a-5p	-0.219595	-0.568665
RT1-Db1	NONRATT011166.2	rno-miR-200a-5p	-0.290727	-0.474825
Shc3	NONRATT011166.2	rno-miR-200a-5p	-0.185771	-0.455468
Smim5	NONRATT011166.2	rno-miR-200a-5p	-0.224262	-0.576952
Snhg11	NONRATT011166.2	rno-miR-200a-5p	-0.257545	-0.55205
Sv2b	NONRATT011166.2	rno-miR-200a-5p	-0.165282	-0.619797
Tmem184b	NONRATT011166.2	rno-miR-200a-5p	-0.21037	-0.541995
Vtn	NONRATT011166.2	rno-miR-200a-5p	-0.139125	-0.666546
Wipf3	NONRATT011166.2	rno-miR-200a-5p	-0.2228	-0.577835
AABR07004993.1	NONRATT011166.2	rno-miR-322-5p	-0.277837	-0.569097
AY172581.9	NONRATT011166.2	rno-miR-322-5p	-0.163841	-0.533449
Cndp1	NONRATT011166.2	rno-miR-322-5p	-0.474253	-0.491987
Cyp26b1	NONRATT011166.2	rno-miR-322-5p	-0.264542	-0.53819
Cyp2c11	NONRATT011166.2	rno-miR-322-5p	-0.198855	-0.599964
Dnah9	NONRATT011166.2	rno-miR-322-5p	-0.299414	-0.54365
Fst	NONRATT011166.2	rno-miR-322-5p	-0.178384	-0.659349
Il12rb1	NONRATT011166.2	rno-miR-322-5p	-0.298106	-0.532073
Irf2bp1	NONRATT011166.2	rno-miR-322-5p	-0.26002	-0.578117
Itk	NONRATT011166.2	rno-miR-322-5p	-0.136546	-0.675371
Moap1	NONRATT011166.2	rno-miR-322-5p	-0.186185	-0.506186
Pde4c	NONRATT011166.2	rno-miR-322-5p	-0.443116	-0.457816
Ppp1r1b	NONRATT011166.2	rno-miR-322-5p	-0.148457	-0.704929
Prelid2	NONRATT011166.2	rno-miR-322-5p	-0.13832	-0.646123
Rcan2	NONRATT011166.2	rno-miR-322-5p	-0.267024	-0.523617
RT1-Ba	NONRATT011166.2	rno-miR-322-5p	-0.263952	-0.568665
RT1-Db1	NONRATT011166.2	rno-miR-322-5p	-0.35227	-0.474825
Shc3	NONRATT011166.2	rno-miR-322-5p	-0.253435	-0.455468
Smim5	NONRATT011166.2	rno-miR-322-5p	-0.28578	-0.576952
Snhg11	NONRATT011166.2	rno-miR-322-5p	-0.337058	-0.55205
Sv2b	NONRATT011166.2	rno-miR-322-5p	-0.208866	-0.619797
Tmem184b	NONRATT011166.2	rno-miR-322-5p	-0.365048	-0.541995
Vtn	NONRATT011166.2	rno-miR-322-5p	-0.179588	-0.666546
Wipf3	NONRATT011166.2	rno-miR-322-5p	-0.271133	-0.577835
AABR07004993.1	NONRATT011166.2	rno-miR-374-5p	-0.448693	-0.569097
AY172581.9	NONRATT011166.2	rno-miR-374-5p	-0.384702	-0.533449
Cmah	NONRATT011166.2	rno-miR-374-5p	-0.210385	-0.740786
Cndp1	NONRATT011166.2	rno-miR-374-5p	-0.876172	-0.491987
Cyp26b1	NONRATT011166.2	rno-miR-374-5p	-0.499335	-0.53819
Cyp2c11	NONRATT011166.2	rno-miR-374-5p	-0.351364	-0.599964
Dnah9	NONRATT011166.2	rno-miR-374-5p	-0.526547	-0.54365
Fst	NONRATT011166.2	rno-miR-374-5p	-0.293502	-0.659349
Gjd2	NONRATT011166.2	rno-miR-374-5p	-0.429231	-0.657548
Gng7	NONRATT011166.2	rno-miR-374-5p	-0.280272	-0.693919
[truncated: 3,147 more rows]
